1 **Combining metabarcoding and morphological approaches to identify**  
2 **phytoplankton taxa associated with harmful algal blooms**

3

4 Svetlana Esenkulova<sup>1,2</sup>, Amy Tabata<sup>1</sup>, Ben J.G. Sutherland<sup>1</sup>, Nicola Haigh<sup>3</sup>, Christopher M.  
5 Pearce<sup>1</sup>, Kristina M. Miller<sup>1</sup>

6 <sup>1</sup> Fisheries and Oceans Canada, Pacific Biological Station, Nanaimo, British Columbia, Canada

7 <sup>2</sup> Pacific Salmon Foundation, Vancouver, British Columbia, Canada

8 <sup>3</sup> Microthalassia Inc., Nanaimo, British Columbia, Canada

9

10 \*Author for correspondence: SE

11 Pacific Salmon Foundation, #300 1682 West 7<sup>th</sup> Avenue, Vancouver, BC, Canada, V6J 4S6

12 Phone: 1 (250) 797-0705

13 Email: svesen@uvic.ca

14

15

16

17

18

19

20

21

22

23 **Data Deposition:** Raw sequence was uploaded to SRA under BioProject PRJNA544881 within

24 BioSample accessions SAMN11865982-SAMN11866125.

## ABSTRACT

25  
26 Impacts of harmful algal blooms (HABs) have increased in frequency, intensity, and  
27 geographical distribution in the last several decades. Detection methods to date largely depend  
28 on microscopic observations which require expertise and time-intensive processes. In this study,  
29 we apply microscopic observational methods, quantitative real-time polymerase chain reaction  
30 (qPCR), and metabarcoding with multiple markers (*i.e.* 16S, 18S-dinoflagellate and 18S-diatom,  
31 and large subunit (LSU) rDNA) on cultured (N=30) and field (N=24) samples containing  
32 suspected harmful algae (*e.g.*, *Alexandrium* spp., *Chattonella* sp., *Chrysochromulina* spp.,  
33 *Dictyocha* spp., *Heterosigma akashiwo*, *Protoceratium reticulatum*, *Pseudochattonella*  
34 *verruculosa*, *Pseudo-nitzschia* spp., and *Pseudopedinella* sp). Good detectability was found  
35 using previously published TaqMan assays for *A. tamarense*, *H. akashiwo*, and *P. verruculosa*.  
36 Overall, the multiple marker metabarcoding results were superior to the morphology-based  
37 method for detection and identification of harmful taxa, with the notable exception of taxa from  
38 the silicoflagellate group (*e.g.* *Dictyocha* spp.), which had better detection by morphology.  
39 Metabarcoding results depended greatly on the marker type applied, which highlights the value  
40 of a multiple-marker approach. The combined results of the 18S and the LSU markers closely  
41 corresponded with morphological identification of targeted species and provided the best overall  
42 taxonomic coverage and resolution. The most numerous unique taxa were identified using 18S-  
43 dinoflagellate amplicon (N=167) and the best resolution to species level occurred using LSU  
44 (N=60). This work is the first report of HAB species identification in Canada using a  
45 combination of morphological, metabarcoding, and qPCR approaches. These results emphasize  
46 the benefit of applying molecular techniques to detect HAB taxa and highlight the current  
47 necessity of using multiple markers for accurate detection of the diverse groups that cause  
48 HABs.

49

50

51 **Keywords:** Harmful algal blooms, Next-Generation Sequencing, Metabarcoding, *Alexandrium*,  
52 *Heterosigma*, *Pseudochattonella*

53

## INTRODUCTION

54 Phytoplankton form the base of the marine food web and are required to support healthy aquatic  
55 ecosystems. In some circumstances, however, high-biomass events and/or proliferation of certain  
56 algal species can cause harm to aquatic animals through a variety of means including disruption  
57 of the food web, shellfish poisoning, the development of low oxygen ‘dead zones’ after bloom  
58 degradation, and fish kills through toxins, gill damage, or hypoxia (Rensel and Whyte, 2004).  
59 Collectively, these events are termed harmful algal blooms (HABs). Importantly, there is a  
60 general scientific consensus that public health, fisheries, and ecosystem impacts from HABs  
61 have all increased over the past few decades (*e.g.* Andersen, 2012; Hallegraeff, 2004).

62 The coastal waters of British Columbia (BC), Canada, in the northeast Pacific Ocean,  
63 have one of the longest documented histories of severe HABs going back to the first reported  
64 case in 1793 (Vancouver, 1798). A government program for monitoring the presence of toxins in  
65 shellfish was established in the early 1940s (Taylor and Harrison, 2002) and since then paralytic  
66 shellfish poisoning (PSP) closures have occurred every year. The BC salmon aquaculture  
67 industry initiated and has been supporting the Harmful Algae Monitoring Program (HAMP)  
68 since the 1990s due to the devastating effects of harmful algae on farmed fish (Horner et al.,  
69 1997; Rensel and Whyte, 2004). During 2009–2012, direct losses to the BC salmon aquaculture  
70 industry from HABs were ~13 M USD (Haigh and Esenkulova, 2014). HABs are currently one  
71 of the most significant risks for the BC aquaculture industry, regularly causing severe economic  
72 losses through finfish/shellfish mortalities and shellfish harvest closures due to toxin  
73 accumulation (Whyte et al., 1997). Therefore, there is an ongoing and pressing need for  
74 monitoring and research on HABs phenomena in coastal BC.

75 Monitoring HABs typically depends on the effective identification and enumeration of  
76 species of concern in water samples. Algal cell identification has long been accomplished based  
77 on morphology revealed through visual microscopic examination. Although traditional light  
78 microscopy currently remains the standard, it has limitations when it comes to certain species  
79 and strains that cannot be easily visualized or cannot be discriminated between harmful and  
80 benign variants based on morphological characteristics alone (Hallegraeff, 2004). Moreover,  
81 microscopic identification is highly dependent on the level of expertise and experience of the  
82 individual analyzing the samples and with fewer morphological taxonomists being trained, it is  
83 increasingly difficult to keep up with the demand. In recent years, studying HABs with

84 molecular techniques, either in tandem with morphological methods or independently, has  
85 become increasingly popular. Quantitative real-time polymerase chain reaction (qPCR) is a  
86 powerful method for detecting and quantifying DNA over a broad dynamic range (Livak and  
87 Schmittgen, 2001). This method has been used for species-specific harmful algal detection and  
88 enumeration (*e.g.* Antonella and Luca, 2013; Eckford-Soper and Daugbjerg, 2015; Scholin et al.,  
89 2011). High-throughput platforms, such as the Fluidigm BioMark, allow for the use of multiple  
90 species-specific probes for simultaneous detection and enumeration of multiple taxa (Medlin and  
91 Orozco, 2017) with the potential for both time and cost savings, as well as the additional ability  
92 to identify cryptic species, compared to traditional light microscopy. Next-generation sequencing  
93 (NGS) methods, as applied through metabarcoding, allow for millions of sequencing reactions to  
94 be performed in parallel, resulting in the ability to generate massive amounts of sequencing data  
95 (Goodwin et al., 2016; Valentini et al., 2016). Sequence-based taxonomic approaches can allow  
96 for the identification of multiple species of interest, including nano- and picoplankton, rare and  
97 fragile taxa, and cryptic species, in a reproducible and cost effective manner (*e.g.* Eiler et al.,  
98 2013).

99 The objective of the present study was to obtain microalgal taxa that are known or  
100 suspected to be harmful to cultured fish and shellfish in BC and to identify these taxa through  
101 light microscopy as well as genetic methods. Fish-killing algae targeted included *Chaetoceros*  
102 *conconvolutus*, *C. convolutus*, *Chattonella* sp., *Chrysochromulina* spp., *Cochlodinium fulvescens*,  
103 *Dictyocha* spp., *Heterosigma akashiwo*, *Karenia mikimotoi*, and *Pseudochattonella verruculosa*.  
104 Shellfish-poisoning algae included *Alexandrium* spp., *Dinophysis* spp., *Protoceratium*  
105 *reticulatum*, and *Pseudo-nitzschia* spp. During this study, cultures and water samples for  
106 identification of these species were primarily acquired from HABs occurring in coastal BC. Here  
107 we describe, compare, and cross validate coastal BC harmful algae identification based on  
108 morphology, qPCR, and metabarcoding.

109

110

## METHODS

### *Ethics Statement*

112 No permits were required for collection of water samples in Canadian coastal waters.

113

## 114 **Sample Collection**

115 All samples used in this study were collected in coastal BC waters (Table 1), except for two that  
116 were obtained from the Provasoli-Guillard National Center for Marine Algae and Microbiota  
117 (Samples s01, s02) that were used to test primer specificity and to optimize qPCR reactions. All  
118 samples (N=54), with their respective sampling locations, are summarized in Table 1 and Fig. 1.

119 Field samples of algae were obtained by collecting seawater with a 1 L sampling bottle  
120 (Venrick, 1978). Samples to be used for culturing and genetic analyses were kept cool and dark  
121 until processed. Samples for microscopic identification were immediately preserved with  
122 Lugol's iodine (Andersen and Thronsen, 2004) and then shipped to the laboratory for  
123 taxonomic analysis. Identification and enumeration of phytoplankton based on morphology was  
124 done with a compound microscope using a Sedgewick-Rafter slide (Guillard, 1978).  
125 Identification based on morphology was done to the lowest possible taxonomic level (Hasle,  
126 1978), by an experienced phytoplankton taxonomist.

127

## 128 **Cultures**

129 Cultures for this study were isolated by serial dilution from the unpreserved field water samples  
130 and from sediments collected from sites with HABs observed in the past (see Table 1 for sample  
131 origins), as some harmful algae produce cysts that play an important role in initiating subsequent  
132 blooms (Anderson et al., 2003). Several sediment samples were taken from three areas around  
133 Vancouver Island (*i.e.* Baynes Sound, Okeover Inlet, Quatsino Sound; Fig. 1) in late winter and  
134 spring 2013. Target species for isolation and germination were *Alexandrium* spp. due to the  
135 numerous PSP closures recorded in Baynes Sound and Okeover Inlet in summer 2012 (DFO,  
136 2012), as well as *H. akashiwo* and suspected *Chattonella* spp. that caused fish mortalities in late  
137 summer 2012 in Quatsino Sound (Haigh, personal observation). Sampling was done using van  
138 Veen and Ekman grab samplers. Sediment samples (3 – 5 L) were taken from depths of 5 – 45  
139 m. Sites were chosen based on the assumption that cysts accumulate in the same areas as silt and  
140 clay (Wall and Dale, 1967). The upper 3 cm of sediments in the grab samples were collected,  
141 mixed well, and immediately placed in containers and kept cool and dark.

142 Culture establishment from the collected samples occurred as described in detail  
143 previously (Esenkulova et al., 2015). In brief, sediments were sieved to produce a 20 – 120- $\mu$ m  
144 fraction and incubated in enriched natural seawater medium (Harrison et al., 1980) at 18 °C

145 under continuous illumination ( $20 \mu\text{mol photons m}^{-2} \text{ s}^{-1}$  provided by full-spectrum fluorescent  
146 lamps). Serial dilutions were performed in a laminar flow hood using a micropipette and sterile  
147 24-well plates. Several cultures of *A. tamarense*, *H. akashiwo*, and *Chattonella* spp.? (question  
148 mark indicates that taxon is suspected, but not positively identified by light microscopy) were  
149 successfully established. Isolation from water samples produced cultures of *Alexandrium* sp.,  
150 *Chaetoceros eibonii* (a non-harmful species), *Chattonella* sp.?, *H. akashiwo*, *Protoceratium*  
151 *reticulatum*, *Pseudochattonella* cf. *verruculosa*, and *Pseudo-nitzschia* spp. Some cultures were  
152 pure (appeared to contain a single species) and some were mixed (contained multiple species).

153

### 154 ***DNA Extraction and Purification***

155 Water samples for genetic analyses were either filtered or pelleted. For filtered water samples,  
156 60–100 mL of water was filtered through 25-mm or 47-mm GF/F Whatman filters and then  
157 frozen at  $-20 \text{ }^{\circ}\text{C}$  or stored in 75–95% ethanol until DNA extraction. A section of  $\frac{1}{4}$  of the 47-mm  
158 filters or  $\frac{1}{2}$  of the 25-mm filters were used for the extraction. Water samples concentrated by  
159 centrifugation were subsampled and 1.5 – 40 mL centrifuged at  $8,000 \times g$ , the supernatant  
160 removed, and the resultant pellet stored in 95% ethanol until DNA extraction. The variation in  
161 sampling volumes and sample methods occurred due to the large variation of suggested methods  
162 in the available literature. Cultured samples for molecular analyses were taken from ~200-mL  
163 cultures in a laminar flow hood, whereby samples of well-mixed cultures were divided in 2 x 20-  
164 mL subsamples and centrifuged for 15 min at  $5,000 \times g$  for 10 min. The supernatant was  
165 decanted, samples were re-suspended in 1 mL of phosphate buffered saline, transferred to 2-mL  
166 microfuge tubes, and then centrifuged again at  $4,000 \times g$  for 10 min. Finally, the supernatant was  
167 again removed and cell pellets frozen at  $-20 \text{ }^{\circ}\text{C}$  until extraction.

168 DNA was extracted and purified from all samples using the DNeasy Blood and Tissue kit  
169 (Qiagen, Toronto, Canada) as per manufacturer's instructions, with the addition of a  
170 homogenization step using a TissueLyser 2 homogenizer (Qiagen) with a 4-mm steel bead. DNA  
171 concentration was measured by spectrophotometry (NanoDrop, ND-1000).

172

### 173 ***qPCR Assays***

174 A literature search was undertaken to identify published TaqMan-based qPCR assays for harmful  
175 algal taxa of interest in the northeast Pacific Ocean. TaqMan assays were found for five targeted

176 taxa: six assays for *Alexandrium* spp., two for *Chattonella* spp., three for *H. akashiwo*, two for *K.*  
177 *mikimotoi*, and two for *P. verruculosa*. Additional published TaqMan assays for known harmful  
178 algae from other parts of the world were also included, bringing the total number of target algal  
179 taxa to 28 and the number of assays to 39 (Table 2).

180 The qPCR reactions using all assays (Table 2) were conducted on a Fluidigm BioMark™  
181 platform (Fluidigm Corporation, San Francisco, CA, USA) using a 96x96 dynamic array to run  
182 9,216 reactions simultaneously (96 samples with 96 assays) as described in detail in Miller et al.  
183 (2016). To reduce the effect of PCR inhibitors that can be problematic in algae, samples were  
184 tested at concentrations of 10 and 2.5 ng uL<sup>-1</sup> or, if the DNA concentration was below that, at the  
185 highest available concentration. Each assay was run in duplicate.

186 Briefly, a pre-amplification (STA) step of 14 cycles using dilute (50 nM in a 5-uL  
187 reaction) primer pairs of each assay with TaqMan Preamp MasterMix (Applied Biosystems,  
188 Foster City, CA, USA) was performed according to the BioMark protocol (Applied Biosystems).  
189 Unincorporated primers were removed with ExoSAP-IT (Affymetrix, Santa Clara, CA, USA)  
190 and samples were then diluted 1:5 in DNA Suspension Buffer (Teknova, Hollister, CA, USA). A  
191 5-μL sample mix was prepared for each pre-amplified sample with TaqMan Universal Master  
192 Mix (Life Technologies Corporation, Carlsbad, CA, USA) and GE Sample Loading Reagent  
193 (Fluidigm Corporation) and a 5-μL aliquot of assay mix was prepared containing 10-μM primers  
194 and 3-μM probes for each separate TaqMan assay and each was loaded onto a pre-primed  
195 dynamic array. An IFC controller HX pressurized and mixed the assays and samples from their  
196 individual inlets on the dynamic array and the PCR was run on the BioMark with the following  
197 conditions: 50 °C for 2 min, 95 °C for 10 min, followed by 40 cycles of 95 °C for 15 s and 60 °C  
198 for 1 min. Output data was analyzed and the cycle threshold (Ct) per sample determined using  
199 Fluidigm Real Time PCR Analysis software (Fluidigm Corporation). Cycle threshold values for  
200 qPCR replicates were averaged in the final results.

201

### 202 ***Metabarcoding and Sequencing***

203 Four primer pairs were selected for use in NGS metabarcoding from published studies with the  
204 goal of amplifying a broad range of algal taxa (see Table 2). Illumina adaptors were incorporated  
205 onto the 5' end of each primer for the attachment of Nextera XT Illumina indices (Illumina, Inc.,  
206 San Diego, CA, USA) in the second round of PCR. Input sample DNA was normalized to 5 ng



207  $\mu\text{L}^{-1}$  when starting concentrations allowed. The primer sets were used as the initial primers in a  
208 two-step PCR process to construct and sequence four Nextera XT libraries according to the  
209 Illumina 16S Metagenomic Sequencing Library Preparation protocol (15044223, Rev. B).  
210 Library quantification, normalization, pooling, and sequencing on a MiSeq with a 600-cycle flow  
211 cell (MiSeq Sequencing Kit v3, 600 bp, Illumina, Inc.) were performed according to the  
212 manufacturer's protocols, with the only modification being that the final, pooled library was run  
213 at a concentration of 16 pM with 10% PhiX control.

214

### 215 ***Bioinformatics***

216 All sequence data was de-multiplexed using input sample barcodes during file export from the  
217 sequencer (Illumina, Inc.), resulting in a pair of fastq files for each individual sample. Quality of  
218 raw sequence fastq files was evaluated in FastQC (Andrews and Babraham Bioinformatics,  
219 2010) with results aggregated using MultiQC (Ewels et al., 2016). In general, the OBITools  
220 package (Boyer et al., 2016) was used for the analysis of the different amplicons, but each  
221 amplicon required specific inputs due to different features of the data. All bioinformatics steps  
222 are outlined in detail on GitHub (see *Data Availability*), and explained here per marker type (*i.e.*  
223 LSU, 18S, 16S). For LSU and 18S, due to the larger size of amplicons and the lack of read  
224 merging for these paired-end datasets, only the forward reads were used. For 16S, paired-end  
225 data were used as most reads overlapped and therefore were able to be merged.

226 For LSU (single-end data), primers were removed using cutadapt (Martin, 2011) and then  
227 reads were formatted for the OBITools pipeline using *ngsfilter* (OBITools) on each sample  
228 without any input barcodes. Each formatted input sample file was then annotated with a sample  
229 identifier in read headers with *obiannotate*. Sample labeled fastq files were then combined to a  
230 single file, with reads cut to a uniform size (*i.e.* 230 bp) to reduce singleton records due to slight  
231 differences in read length for single-end data. Subsequently, this file was moved into the  
232 standard OBITools pipeline (see below).

233 For 18S (single-end data), there were two different amplicons, one for dinoflagellates and  
234 one for diatoms (*i.e.* 18S-dinoflagellate, 18S-diatom). These two amplicon types were de-  
235 multiplexed using *ngsfilter*, which output a single fastq file per sample, but from both amplicon  
236 types. A custom script separated the two types of amplicons (see *Data Availability*). *Obiannotate*  
237 was used to annotate each sample-amplicon type with sample and amplicon identifiers. All data



238 was then merged into a single file, cut to a uniform size using cutadapt (as above), and then  
239 moved into the standard OBITools pipeline.

240 For 16S (paired-end data), primers were removed using cutadapt, overlapping reads were  
241 merged using *illuminapairedend* retaining merged data with an overlap score  $\geq 40$  (OBITools),  
242 samples were annotated with a sample identifier, and then combined to a single file and moved  
243 into the standard OBITools pipeline.

244 Once all data were input in a uniform format into the main pipeline as described above,  
245 the OBITools package was used to retain a single representative accession per unique amplicon  
246 sequence, keeping record of the number of reads per sample for the accession in the accession  
247 header using *obiuniq*. Subsequently, the data were de-noised using a size filter and a low count  
248 threshold (*obigrep*) and by removing ‘internal’ sequences (*i.e.* probable PCR/sequencing errors;  
249 *obiclean*), as per standard OBITools approaches (Boyer et al., 2016). The counts per  
250 representative unique amplicon were exported using *obitab*.

251 The unique amplicon file for each amplicon type was annotated using BLAST (Altschul  
252 et al., 1997) run in parallel (Tange, 2011), receiving ten alignments per BLAST query. For each  
253 unique amplicon accession, taxa were assigned using MEGAN (Huson et al., 2016) using the  
254 Lowest Common Ancestor (LCA) algorithm with the following parameters: min score = 100;  
255 max expected =  $10^{-9}$ ; min % ID = 97; top % 10; min support % (off); and min support = 1. Any  
256 amplicon that received a BLAST result, but was not assigned using MEGAN due to parameters  
257 set within MEGAN was put in the ‘Not assigned’ category. Any amplicon without a BLAST  
258 result at all was put in the ‘Unknown’ category. Read counts were connected to annotations from  
259 the MEGAN output using custom R (“R Core Team,,” 2018) scripts (see *Data Availability*). A  
260 threshold of at least 10 reads per sample-taxon combination was applied to reduce the potential  
261 for false positive detection and any sample-taxon combination with fewer than this was  
262 transformed to 0. Taxa proportions were calculated by dividing the count per taxon for a sample  
263 by the total number of reads for the sample. Taxon ranks and the classification of identified taxa  
264 was enabled using *taxize* (Chamberlain and Szöcs, 2013; Scott et al., 2019) in R, and a custom  
265 database was created to contain assembly taxonomy, read count, and sample information. Bar  
266 plots were constructed using ggplot2 in R (Wickham, 2016) and pie charts constructed using  
267 Krona (Ondov et al., 2011).

268

## RESULTS

### 269 ***Morphological Identification***

270 In total, 54 samples containing either cultured (N=30) or field (N=24) collections of ten  
271 suspected harmful algal taxa identified by morphology were obtained during this study,  
272 including *Alexandrium* spp., *Chattonella* sp., *Chrysochromulina* spp., *Cochlodinium fulvescens*,  
273 *Dictyocha* spp., *Heterosigma akashiwo*, *Protoceratium reticulatum*, *Pseudochattonella*  
274 *verruculosa*, *Pseudo-nitzschia* spp., and *Pseudopedinella* sp. (note: *Pseudopedinella* was not  
275 initially targeted, but was acquired opportunistically at a suspected HAB event). Although other  
276 species were initially targeted, they were unable to be acquired for complete analysis, due to  
277 either low cell concentrations in field samples (*i.e.* *C. concavicornis*, *C. convolutus*, and  
278 *Dinophysis* spp.) or due to a general absence in field samples (*i.e.* *K. mikimotoi*). All samples  
279 obtained for this study are listed in Table 1.

280

### 281 ***Extraction Efficiency for Molecular Methods***

282 Sample collection volumes, types, and preservation methods varied throughout the collection  
283 time period as sampling and extraction protocols were still being optimized. As such, DNA  
284 quantity in extractions was highly variable due to the variety in the sample state, density, and  
285 preservation methods applied. Cultured samples gave the highest yields. Filtered field samples  
286 generally resulted in lower, but adequate yields. Pelleted field samples resulted in low and often  
287 unusable yields. After extractions, 46 of the 54 samples had sufficient high-quality DNA for  
288 molecular analyses. Samples with insufficient DNA (*i.e.* s025, s026, s027, s029, s039, s051,  
289 s052, s054) were not run on qPCR, but two of these samples (*i.e.* s029 and s054) were run  
290 through NGS and returned OTUs (<25 and <1,350, respectively). Five samples (*i.e.* s034, s045,  
291 s046, s050, s053) had low DNA concentration, but returned positive results with qPCR and  
292 NGS.

293

### 294 ***Taxa Identified by qPCR***

295 A total of 46 samples with sufficient DNA concentrations were run using qPCR. However, only  
296 eight of 39 applied TaqMan assays provided amplification with one or more of the samples  
297 (Table 3), and the rest (N=31 assays) did not return positive results in any samples. These eight  
298 assays amplified within 44 of the samples. Targeted species that were detected via qPCR

299 included *Alexandrium* spp./*A. tamarense*, *H. akashiwo*, and *P. verruculosa*. The targeted  
300 *Chattonella* spp. had four different qPCR assays, but none resulted in detections. Other species  
301 that are potentially harmful were identified by qPCR, but were not specifically identified by  
302 microscopy. For example, cyanobacteria species were detected in nine samples, *G. instriatum* in  
303 three and *Karlodinium micrum/veneficum* in eleven samples. Nine targeted taxa were not  
304 quantifiable by qPCR due to a lack of published TaqMan assays: *C. concavicornis*, *C.*  
305 *convolutus*, *Chrysochromulina* spp., *Cochlodinium fulvescens*, *Dictyocha* spp., *Dinophysis* spp.,  
306 *P. reticulatum*, and *Pseudo-nitzschia* spp. Due to the fact that this study ran the assays under  
307 different conditions than they were designed for, and due to algae strain variability, the  
308 possibility for false negatives or positives cannot be excluded. To confirm if the sample  
309 contained a target species, and therefore to determine the effectiveness of the tested assays and  
310 correspondence to microscopy, NGS was conducted. The relative effectiveness of the qPCR  
311 results in comparison to microscopy and metabarcoding is provided in the *Discussion*.

312

### 313 ***Metabarcoding Overview***

314 In total, over 350 individual taxa were detected by metabarcoding and NGS. NGS returned  
315 results for 48 of 48 sequenced samples. Detailed results of the analysis including all taxa and  
316 associated read counts are provided in Supplemental Tables S1-4.

317 The most numerous unique taxa occurred through using the 18S-dinoflagellate amplicon  
318 (Table 4), which returned 167 individual taxa, including 49 to the species level. For comparison,  
319 the 16S amplicon identified 69 individual taxa (21 to the species level), and 18S-diatom 78 taxa  
320 (18 to the species level). The LSU data identified 136 individual taxa and was the most effective  
321 at resolving data to the species level (N=60 species), which is noteworthy given the importance  
322 of species-level identification when identifying harmful algae. Only one taxon, *H. akashiwo*, was  
323 identified by all four amplicons. Many similar taxa (N=20) were detected by 18S-diatom, 18S-  
324 dinoflagellate, and LSU amplicons, but only three were identified to the species level.

325 The numbers of reads per taxonomic category, with an emphasis on microalgal groups,  
326 are listed in Table 5. Total microalgae reads detected by 18S-diatom, 18S-dinoflagellate, and  
327 LSU runs were more than 85% of all reads (not including unknowns) for each amplicon, whereas  
328 microalgae reads from 16S run comprised less than 50%. The majority of microalgal reads for all  
329 amplicons belonged to raphidophytes. The 18S-dinoflagellate amplicon detected the most

330 microalgal groups and the 16S amplicon detected the fewest microalgal groups. Silicoflagellates  
331 (Dictyochophyceae), an important group that includes several harmful and potentially harmful  
332 species, were detected only by 18S-diatom and 18S-dinoflagellate amplicons.

333 All harmful and potentially harmful algal taxa reads (*i.e.* at the species, genus, and family  
334 level) detected by all amplicons are provided in Table 6. For a more convenient comparison  
335 between results employing different amplicons, grouping of harmful and potentially harmful  
336 algae species to genus level was done for *Alexandrium* spp., *Chattonella* spp., *Dinophysis* spp.,  
337 *Karlodinium* spp., *Phalacroma* spp., *Prymnesium* spp., *Pseudo-nitzschia* spp., and  
338 *Pseudochattonella* spp.

339 Overall, most of the reads of harmful and potentially harmful algae were detected by  
340 LSU and 18S-dinoflagellate amplicons (Table 6). At the species and genus levels, the LSU  
341 amplicon provided the most reads for dinoflagellate species within the *Cochlodinium*,  
342 *Dinophysis*, *Karlodinium*, and *Phalacroma* genera, as well as haptophytes in the  
343 *Chrysochromulina* and *Prymnesium* genera. The 18S-dinoflagellate amplicon detected the most  
344 reads for species within the *Alexandrium*, *Pseudochattonella*, and *P. reticulatum* genera, whereas  
345 the 18S-diatom amplicon detected the most reads for *Pseudo-nitzschia* spp. as well as the  
346 raphidophytes *Chattonella* sp. and *H. akashiwo*. There were no instances when 16S detected the  
347 most reads for any of the listed taxa.

348 The total reads and percentages per sample detected by different amplicons are shown in  
349 Figure 2. Specifically in this plot, when a taxon of harmful or potentially harmful algae had less  
350 than 100 reads, it was grouped within an appropriate, larger algae category, *e.g.* *Karlodinium*  
351 spp. with 77 reads were included in the dinoflagellates counts; *Prymnesium* spp. with 20 reads  
352 and Prymnesiaceae with 11 reads were included in haptophytes (Figure 2). Overall, based on the  
353 results for all four amplicons, culture samples had a higher number of reads, by an order of  
354 magnitude, and lower algal species diversity than field samples (Figure 2, Supplement 5).

355 A comparison of microscopy and NGS taxonomic identification in each of the 48 samples  
356 revealed that the majority of the taxa detected by microscopy also were identified in the NGS  
357 results (Supplement 6). Species and genera that were positively identified by both microscopy  
358 and NGS included: *Alexandrium*, *Chaetoceros*, *Cochlodinium*, *H. akashiwo*, *P. reticulatum*,  
359 *Pseudochattonella*, and *Pseudo-nitzschia*. There were a few notable exceptions, with the two  
360 most consistently observed mismatches being (i) all suspected *Chattonella* spp. (10 field and

361 cultures) were identified by NGS as *H. akashiwo*; and (ii) *Dictyocha* spp., *P. verruculosa*,  
362 *Pseudochattonella* sp., and *Pseudopedinella* spp. (*i.e.* all three silicoflagellate genera) were not  
363 detected in 11 out of 15 samples by any of the amplicons. Although these samples had unknown  
364 and unassigned reads in NGS results (Supplement 6), the sequences for all of the species not  
365 identified by NGS but identified with microscopy were in fact present in the Gen Bank database,  
366 and therefore the reason for the lack of these taxa, as well as the identity of these unknown reads  
367 remains unknown.

368

369

## DISCUSSION

### 370 *Harmful Algae: Comparing Microscopy and Molecular Approaches*

371 The term ‘algae’ comprises a diverse, polyphyletic group that encompasses organisms from  
372 widely different taxonomic domains and includes eukaryotes and prokaryotes. Major algal  
373 groups include diatoms, dinoflagellates, raphidophytes, silicoflagellates, haptophytes, and  
374 cyanobacteria. Identification methods applied to each of these groups will be outlined in detail  
375 below.

376

### 377 *Diatoms*

378 Diatoms are the major group of microalgae with approximately 250 modern genera and  
379 thousands of species (Hasle and Syvertsen, 1996). There are only a few diatom taxa that are  
380 harmful due to toxin production (*i.e.* several species from the *Pseudo-nitzschia* genus) or cell  
381 structures that cause mechanical damage to gills (*e.g.* *C. concavicornis* and *C. convolutus*). In  
382 our study, only one sample contained a potentially harmful diatom – the culture of *Pseudo-*  
383 *nitzschia* sp. Positive identification of *Pseudo-nitzschia* to the species level with microscopy can  
384 be ensured only with scanning electron microscopy (SEM), which is a very costly and time-  
385 consuming technique not generally implemented in routine monitoring. In our study, both the  
386 18S-diatom and LSU amplicons showed promising results by confirming *Pseudo-nitzschia*  
387 presence (>10,000 reads, >98% of the total reads in the cultured sample). However, it also did  
388 not discriminate to the species level. The same amplicons detected very low presence (<1%) of  
389 *Pseudo-nitzschia* spp. in five other samples where cell presence was not detected using  
390 microscopy. Most of these samples were presumed monocultures of other species that were

391 processed on the same day (*i.e.* culture subsampled, DNA extracted and purified), and NGS  
392 results may indicate possible low-level cross contamination from high concentration, pure  
393 cultures that occurred in the lab in the same flow hood.

394

### 395 ***Dinoflagellates***

396 Dinoflagellates are second to diatoms in terms of importance to marine primary production, with  
397 about 2000 described extant species (Taylor et al., 2008). This group is particularly important for  
398 HABs, as about 75–80% of known toxic phytoplankton species belong to this group (Cembella,  
399 2003). Microscopy indicated that there were nine samples containing *Alexandrium* spp.,  
400 *Cochlodinium* sp., or *P. reticulatum*. However, based on molecular techniques, additional  
401 potentially harmful dinoflagellate species were detected (*Dinophysis*, *Karlodinium*, and  
402 *Phalacroma*) and considerably higher numbers of samples containing them were identified. For  
403 dinoflagellates, as expected, the most conclusive results were obtained using the 18S-  
404 dinoflagellate and LSU amplicons.

405

### 406 ***Dinoflagellates: Alexandrium***

407 Many species of *Alexandrium* produce toxins that cause paralytic shellfish poisoning (PSP). In  
408 BC, since the establishment of the monitoring program for toxins in shellfish in the 1940s  
409 (Taylor and Harrison, 2002), PSP closures have occurred every year, and this negatively affects  
410 shellfish aquaculture and recreational harvesting. Six cultured samples of *Alexandrium* were  
411 included in this study. One was a purchased culture of *Alexandrium* cf. *catenella* and five were  
412 locally established cultures microscopically identified as *Alexandrium* sp. and *A. tamarense*; four  
413 of these cultures were monocultures and one was a mixed culture that also contained green algae  
414 and flagellates. The most effective metabarcoding results for *Alexandrium* detection were  
415 obtained using the 18S-dinoflagellate amplicon, closely followed by LSU. Both amplicons  
416 provided comparable results with a very high percentage of total *Alexandrium* reads per sample  
417 for all five of the culture samples (>90% of reads on average) and a low percentage in the mixed  
418 culture (<4%). All six of these samples had highly positive qPCR results using an assay targeting  
419 the toxic North American strain of *A. tamarense* (Toebe et al., 2013).

420         Detections of *Alexandrium* in samples where it was not identified based on microscopy  
421 were less conclusive. There were 19 samples where *Alexandrium* presence was suggested by



422 18S-dinoflagellate and LSU amplicons but not by microscopy. In all cases these were very low  
423 counts of *Alexandrium* (*i.e.* very low percent of reads per sample, ranging from 0.02% to 4.72%).  
424 However, six of these 19 samples also had positive qPCR results with the *A. tamarense* assay,  
425 suggesting that the positives were not completely attributable to false positives from  
426 metabarcoding methods. In addition, there were 10 samples with *A. tamarense* qPCR detection  
427 that were not confirmed by microscopy or metabarcoding. Future work is needed to clarify  
428 exactly which results are correct, the microscopy or the molecular (qPCR and metabarcoding) for  
429 this taxon, and how to best score these detections (*e.g.* weak positives). With the expected higher  
430 sensitivity of molecular assays as compared to microscopy, it is not implausible that low copy  
431 numbers of a HAB species may exist in many mixed cultures, but whether these were introduced  
432 by cross-contamination of cultures, as well as the biological relevance of such levels also would  
433 need further study.

434 While *Alexandrium* presence detected by 18S-dinoflagellate and LSU amplicons was  
435 similar, the biggest difference in these amplicons was in the taxonomic level of identification. In  
436 the 18S-dinoflagellate amplicon, more than 99.50% of *Alexandrium* OTUs were identified to  
437 genus level only, while the very small remainder was assigned to *A. tamarense* (0.46%) and *A.*  
438 *andersonii* (<0.01%). In contrast, the LSU results indicated that 97.31% of total *Alexandrium*  
439 reads belonged to the species *A. fundyense*, 0.05% to *A. tamarense*, with the remainder 2.64%  
440 assigned to the genus level. Based on morphological characteristics, three species (*A. catenella*,  
441 *A. tamarense*, and *A. fundyense*) comprise the *A. tamarense* species complex (Balech, 1985).  
442 These morphospecies are quite similar in appearance and are distinguished mainly based on  
443 formation of chains of cells and features of the cell theca: presence and shape of a ventral pore  
444 between plates 1' and 4', and differences in the shapes of plates. However, recent rDNA  
445 sequencing studies (John et al., 2014; Lilly et al., 2007) found that these three morphospecies did  
446 not satisfy requirements for biological species definition. They suggested that these groups be re-  
447 evaluated and a new species definition was proposed. In our study, clonal cultures that were  
448 morphologically identified as *A. catenella*, *A. tamarense*, and *Alexandrium* spp. were all assigned  
449 to *A. tamarense* by TaqMan and to *A. tamarense* or *A. fundyense* species by metabarcoding,  
450 depending on the amplicon. This ambiguity further supports the proposition that the taxonomy of  
451 the *A. tamarense* species complex should be re-evaluated, with consensus classifications by  
452 molecular methods needing to be updated in sequence databases (*e.g.* GenBank).



453

454 ***Dinoflagellates: Cochlodinium***

455 Two out of approximately 40 known *Cochlodinium* species (*i.e.* *C. polykrikoides* and *C.*  
456 *fulvescens*) form HABs and can cause fish kills (Kudela and Gobler, 2012). In BC, blooms of *C.*  
457 *fulvescens* were implicated in farmed salmon kills that caused ~1.5 M USD in economic losses  
458 (Whyte et al., 2001). Here, *Cochlodinium* was observed by microscopy in two field samples. Its  
459 presence (24 and 992 reads) was detected at the genus level in both of these field samples, but  
460 only by the LSU amplicon. This identification was very conclusive and OTUs of *Cochlodinium*  
461 at the species or genus level were not observed in any of the other 44 samples.

462

463 ***Dinoflagellates: Protoceratium reticulatum***

464 *Protoceratium reticulatum* produces yessotoxins, which can be bioaccumulated by shellfish and  
465 have been associated with diarrhetic shellfish poisoning (DSP) (Satake et al., 1998).  
466 Metabarcoding was very effective for identification of this species. The sample of *P. reticulatum*  
467 from an established culture with identification based on morphology had a positive identification  
468 to the species level when using both the 18S-dinoflagellate and LSU amplicons (143,019, 42,069  
469 reads). The 18S-dinoflagellate amplicon also detected very low presence (<2% of the total reads  
470 per sample) of *P. reticulatum* in another three culture samples and one field sample (s34).  
471 Although the LSU amplicon had comparable readings and percentages to the 18S-dinoflagellate  
472 amplicon, it had lower detections in the unexpected samples (*i.e.* two out of four samples were  
473 positive by LSU).

474

475 ***Dinoflagellates: Dinophysis, Gymnodinium, Karlodinium, and Phalacroma***

476 Algae from the *Dinophysis*, *Gymnodinium*, *Karlodinium*, or *Phalacroma* genera were not  
477 identified in the samples using microscopy, but were detected using molecular methods. Certain  
478 *Dinophysis* and *Phalacroma* species produce toxins that cause DSP, and thus are important to  
479 shellfish aquaculture. In BC, the first reported DSP outbreak was associated with elevated  
480 numbers of *Dinophysis* spp. (Esenkulova and Haigh, 2012). In the present study, a low number  
481 of reads (<200 in total) of *D. parvula*, *P. rapa* (previously known as *D. rapa*), as well as  
482 *Dinophysis* spp. were detected in one field sample using the LSU amplicon. The *Karlodinium*  
483 genus includes several toxin-producing species; for example, *K. veneficum* blooms have been

484 associated with aquatic faunal mortalities for decades (Place et al., 2012). A small number of  
485 reads to the genus and species level (<100 in total) were detected in one field sample by LSU.  
486 Similar results for both *Dinophysis* and *Karlodinium* were obtained using the 18S-dinoflagellate  
487 amplicon, but were only annotated to the genus level. However, metabarcoding results did not  
488 confirm *Karlodinium* presence in ten other samples with positive qPCR results (range: 14 to 29  
489 Ct).

490 Some *Gymnodinium* species produce toxins (Moestrup et al., 2008) and in the present  
491 study there were very weak detections of *G. instriatum* in three samples by qPCR (Ct >30), but  
492 none were found positive by metabarcoding at the species, genus, or order level.

493  
494 ***Raphidophytes***  
495 Raphidophytes are a group of algae with very few species. However, these species include  
496 several taxa that pose some of the most serious threats to finfish aquaculture around the world,  
497 such as *H. akashiwo* and those in the *Chattonella* genus (Hallegraeff, 2004). In our work, the  
498 best results for raphidophytes were obtained using 18S-diatom and LSU amplicons.

499  
500 ***Raphidophytes: Heterosigma akashiwo***  
501 *Heterosigma akashiwo* is a major fish killer in BC, causing economic losses to the BC salmon  
502 aquaculture industry of about ~3.5 M USD per year (Haigh and Esenkulova, 2014). All 24  
503 samples (18 cultures and 6 field) where *H. akashiwo* presence was observed with microscopy  
504 returned positive detections with qPCR and with three of the amplicons. The amplicon with  
505 weaker detection ability was the 18S-dinoflagellate, which identified *H. akashiwo* in only 19 out  
506 of 24 samples. The highest metabarcoding reads were detected by the 18S-diatom amplicon. In  
507 the rest of the samples (N=24), *H. akashiwo* presence was not noted by microscopy observations,  
508 but *H. akashiwo* reads were found in more than 20 of these samples by the 18S-diatom, 16S, and  
509 LSU amplicons, in six using the 18S-dinoflagellate amplicon, and in 11 of these samples by  
510 qPCR. For most of the samples there was a general agreement between *H. akashiwo* read  
511 numbers by the different techniques (e.g. all 18 samples where *H. akashiwo* was not detected by  
512 18S-dinoflagellate had <100 reads per sample by all other techniques; most of the 15 samples  
513 with the highest *H. akashiwo* reads detected by 18S-diatom had the highest levels with other  
514 techniques). One exception to this trend was in the purchased culture of *Chattonella subsalsa*,

515 where a high load of *H. akashiwo* was identified solely by the 16S amplicon. *C. subsalsa*  
516 identification in this case was confirmed by microscopy and other amplicons, so this clearly  
517 indicates a 16S database issue (*i.e.* mis-representation of *C. subsalsa* species as *H. akashiwo*). In  
518 35 samples where *H. akashiwo* presence was suggested based on qPCR results, there was a  
519 general agreement of higher loads (*e.g.* Ct<20) with high OTU read counts (>4,000) in the 18S-  
520 diatom amplicon, but not in other amplicons. However, some samples with lower qPCR loads  
521 (CT=20–29.5) also had very high OTU read counts, with nine samples containing over 10,000  
522 reads. Therefore the quantitation between the read counts and the qPCR was not always  
523 congruent. It is possible that this could be due to mismatches in specificity for the applied assay,  
524 but further work would be needed to better understand this difference.

525

### 526 ***Raphidophytes: Chattonella***

527 Globally, many species of *Chattonella* have been associated with fish kills (Moestrup et al.,  
528 2008) and blooms of *Chattonella* sp. have caused farmed fish mortalities in BC (Haigh and  
529 Esenkulova, 2014). Here, all ten local samples with positive microscopy identification of  
530 *Chattonella* spp. did not return results for this genus by sequencing. Almost all (>99.99%) of the  
531 Raphidophytes reads in these ten samples (*i.e.* one culture, five mixed cultures, and four field  
532 samples) where *Chattonella* presence was suspected based on microscopy, were assigned to *H.*  
533 *akashiwo* by all four amplicons. It is possible that large *Heterosigma* cells were misidentified as  
534 *Chattonella* during microscopy. The purchased culture of *Chattonella subsalsa* was positively  
535 confirmed as *Chattonella* (>99% of total reads) by 18S-diatom and LSU amplicons with a very  
536 small portion (0.04%) identified to the species level (*C. subsalsa*) using the LSU amplicon,  
537 suggesting that the amplicons could identify *Chattonella* if it was present. Therefore, for this  
538 species the NGS approach appeared to be superior to light microscopy identification.

539 A very low number of reads (<30) of *Chattonella* spp. were also detected in four culture  
540 samples of *Alexandrium* spp. and *H. akashiwo* by the 18S-diatom amplicon. This small number  
541 is most likely also an artefact of the subsampling process (*see above*). Only a small portion of the  
542 purchased *C. subsalsa* culture was identified to the species level, and the rest of the non-  
543 purchased samples was identified to genus only, which suggests the difference in resolution may  
544 be a result of species sequence variation that was not reflected in the NCBI database. TaqMan

545 assays for *C. subsalsa* and *C. marina/ovata/antiqua* did not provide positive results with any of  
546 the samples.

547

#### 548 ***Silicoflagellates (Dictyochales)***

549 Silicoflagellates are a small group of algae, many of which possess a siliceous skeleton at certain  
550 stages of their life cycle. Some species from this group cause fish kills (Henriksen et al., 1993),  
551 including farmed salmon mortality events in BC (Haigh and Esenkulova, 2014; Haigh et al.,  
552 2014, Haigh et al. 2019). All four amplicons underperformed in detecting algal species and  
553 genera from the silicoflagellate group. Most of the samples (11 out of 15) where taxa from this  
554 group were observed by microscopy did not have reads annotated as silicoflagellates. The  
555 definitive reason for poor metabarcoding identification performance to this target remains  
556 unknown, however it could be related to the extraction process, to the primers or amplification  
557 process, or due to incomplete databases.

558

#### 559 ***Silicoflagellates (Dictyochales): Dictyochoa***

560 Skeleton-containing cells of *D. speculum* are very easily identified by microscopy based on their  
561 unique shape and size. Blooms of this species have been linked with fish kills around the world  
562 (*e.g.* Henriksen et al., 1993) including in BC (Haigh et al., 2019; Haigh and Esenkulova, 2014).  
563 In our study, six field samples contained *D. speculum* cells, based on microscopy observations,  
564 but there were no reads assigned to the *Dictyochoa* species, genus, or family by any of the NGS  
565 amplicons. One of these samples had a very low number of reads (*i.e.* 12 reads) detected by the  
566 18S-diatom amplicon, but was assigned only to the order level. These results show that with the  
567 current sequencing database, the NGS approach can miss targets at the species, genus, and even  
568 family levels. Further work is needed to improve the sequencing database with sequences from  
569 voucher specimens to determine which assays are capable of differentiating this genus, or species  
570 within this genus, from other closely related taxa.

571

#### 572 ***Silicoflagellates (Dictyochales): Pseudochattonella verruculosa***

573 Both species in the *Pseudochattonella* genus (*i.e.* *P. farcimen* and *P. verruculosa*) have been  
574 implicated in wild and farmed fish kills (*e.g.* Jakobsen et al., 2012). In BC, *Pseudochattonella* sp.  
575 blooms have been associated with farmed fish mortalities since 2007 (HAMP, unpublished data).

576 For this project, one culture from a fish-killing event (Haigh et al., 2014) was established and  
577 five field samples were collected. High and comparable loads (>2,000 reads) of  
578 *Pseudochattonella* genus were detected in the culture sample by 18S-diatom and 18S-  
579 dinoflagellate amplicons. For the former, ~1% of the total reads were assigned to the species  
580 level for *P. farcimen*. This culture sample was also the only one that provided qPCR  
581 amplification results (Ct=14) with the *P. verruculosa* assay. A very low number of reads (<20  
582 reads) of *Pseudochattonella* were detected in one of the field samples, where its presence was  
583 indicated based on microscopy and by 18S-diatom and 18S-dinoflagellate runs, but not by qPCR.  
584 This is the first published confirmation of both qPCR and metabarcoding identification of  
585 *Pseudochattonella* linked to a fish-killing event in Canada.

586

#### 587 ***Silicoflagellates (Dictyochales): Pseudopedinella***

588 Toxicity of *P. pyriformis* (previously known as *P. pyriforme*) was recently discovered in  
589 laboratory studies (Skjelbred et al., 2011). Based on microscopic identification, this species has  
590 been linked to farmed salmon mortality in BC (HAMP, unpublished data). In this work, one  
591 culture and two field samples were available for molecular analysis. All these samples were  
592 obtained from a fish-killing event on the west coast of Vancouver Island. To our knowledge, this  
593 is the first published report of ichthyotoxic effects of *Pseudopedinella* species in the field.  
594 Metabarcoding did not detect *Pseudopedinella* in the available samples, and it did not identify  
595 any reads from the silicoflagellates taxon. The majority of reads in the culture of suspected  
596 *Pseudopedinella* sp. was the diatom *Plagiostriata goreensis* by the 18S-diatom amplicon (98%)  
597 and “not assigned” in the 18S-dinoflagellate and LSU amplicons (94%, 99%, respectively).  
598 While there was therefore no molecular confirmation of the microscopic identification of  
599 *Pseudopedinella* in the fish-kill-related sample, the established culture was certainly not a diatom  
600 and contained *Pseudopedinella*-like cells (small flagellates). To improve this detection method, a  
601 positive control would need to be included, such as a purchased *Pseudopedinella* culture, in  
602 order to ensure that the selected amplicons can identify this genus. However, given the putative  
603 misidentification of the culture of suspected *Pseudopedinella*, it is also possible that this is a  
604 database issue.

605 ***Haptophytes***

606 Toxic haptophytes in the *Prymnesium* and *Chrysochromulina* genera are known to cause fish  
607 mortality (Moestrup, 2003). In our work, the best results were obtained using the 18S-  
608 dinoflagellate and LSU amplicons.

609

610 ***Haptophytes: Chrysochromulina***

611 Haptophytes may be identified with light microscopy to the genus level, but this is challenging  
612 due to small cell size, and species level identification is only possible with scanning electron  
613 microscopy. In BC, blooms of suspected *Chrysochromulina* spp. have been linked to fish kills on  
614 salmon farms since 2000 (HAMP, unpublished data). Our study had four field samples where  
615 *Chrysochromulina* presence was suspected based on microscopy, but two of these samples had  
616 low DNA yields and resulted in <200 total reads per sample. The 18S-dinoflagellate amplicon  
617 detected *Haptolina fragaria* (>100 reads) in the other two samples. *Haptolina fragaria*  
618 (presumably a non-toxic Prymnesiales species), originally described as *Chrysochromulina*  
619 *fragaria* (Eikrem and Edvardsen, 1999) but later described to a new genus from ribosomal DNA  
620 phylogenetics (Edvardsen et al., 2011). Low levels of *Chrysochromulina* spp. were also detected  
621 by the LSU amplicon (220 reads, 0.35%) in one field sample where its presence was not  
622 indicated based on microscopy. With the importance of haptophyte species in fish-kills, and the  
623 difficulty in microscopic identification of these species, this is an area where better detection by  
624 molecular methods would be of strong practical use.

625

626 ***Cyanobacteria***

627 Cyanobacteria, or blue-green algae, are highly diverse aquatic bacteria with over 2,000 species  
628 (Nabout et al., 2013). More than 55 of them have been shown to produce toxins that are harmful  
629 to humans, as well as other terrestrial and aquatic life (Cronberg, 2003). Due to their generally  
630 small size and limited significance to marine finfish, cyanobacteria are not recorded and  
631 identified during routine harmful algae analysis in BC by HAMP, unless they appear to dominate  
632 in the sample. Here, only one sample (mixed culture) had evidence of possible cyanobacteria  
633 presence (based on microscopy), and was mixed with green algae. The cyanobacteria presence in  
634 this sample was not confirmed by molecular techniques, but cyanobacteria were detected in other  
635 samples by molecular techniques where its presence was not described based on microscopy.



636 Nine samples provided amplification results with qPCR (Ct=17–29), but only one of these  
637 samples had evidence for cyanobacteria presence based on metabarcoding, using the 16S  
638 amplicon (Synechococcaceae, 101 reads, 0.1%). Whether the qPCR results are species specific,  
639 or whether the 16S metabarcoding was missing these detections remains unknown, and requires  
640 further study.

641

### 642 *Summary of Methods Evaluation*

643 Development of molecular methods for harmful taxa detection and abundance estimation is an  
644 active area of research. The present study allowed for an evaluation and cross validation of  
645 traditional microscopy and current molecular techniques and assays for each taxon relevant to  
646 BC HABs (Table 7). The best molecular technique, as determined by highest detection rate using  
647 currently available assays was identified based on the results such as taxon resolution, the  
648 conclusiveness of the detection, and whether it was confirmatory of microscopy results.  
649 Molecular techniques, and metabarcoding in particular, proved to be a very promising  
650 complement, and in some cases potentially an alternative given additional benchmarking, to  
651 standard microscopy. However, there is still much work to be done to develop a curated database  
652 with voucher specimens to ensure adequate representation and detectability of all of the  
653 important HABs forming species. The comprehensive nature of the metabarcoding approach is  
654 another benefit, where many species can be simultaneously detected even from different  
655 taxonomic levels. Information obtained during this research provides a foundation to build upon,  
656 for example, by using the sequencing results to identify species presence, to develop specific  
657 qPCR primers, and to identify existing gaps in sequence databases.

658 Quantitative PCR is a cost effective approach and can be used for presence/absence as  
659 well as quantitative estimates of targeted species, however it requires existing knowledge of  
660 potential HABs taxa that may be present in monitored samples. In our study, existing TaqMan  
661 assays were found for only four out of 14 targeted taxa. Assays for detection of *A. tamarensis*  
662 (*A.tam1*), *H. akashiwo* (*H.aka1*), and *P. verruculosa* (*P.ver1*) performed well and could be  
663 implemented in routine monitoring. Ten taxa that were identified by microscopy did not have a  
664 molecular assay available during the time of this study, including *Chrysochromulina* spp.,  
665 *Cochlodinium fulvescens*, *C. concavicornis*, *C. convolutus*, *Dictyocha* spp., *Dinophysis* spp., *K.*  
666 *mikimotoi*, *Protoceratium reticulatum*, and *Pseudo-nitzschia* spp. These particular taxa are an



667 important priority for assay development for application in BC. Sequencing data, acquired during  
668 this work, provides an ability to develop tailored qPCR assays.

669         The metabarcoding approach offered accurate identification of multiple species and was  
670 superior when applied to the detection and identification of cryptic species that cannot be  
671 differentiated to the species level by light microscopy (*e.g. Chrysochromulina, Prymnesium*). It  
672 generated high-throughput data, providing community composition diversity information for the  
673 samples, including capturing some potentially harmful taxa that were not originally targeted, as  
674 well as providing some cursory information on relative abundance, although the reliability of  
675 abundance estimates has not yet been conducted. The presence of a large number of unannotated  
676 reads in a number of samples suggests that the sequences of a number of species are still missing  
677 from the public databases. This will improve with curated databases, which will be generated as  
678 this method and application continues to be developed.

679         The highly sensitive nature of this technique emphasised the need for extremely careful  
680 sample handling, as detections of pure cultures transferring small proportions of taxa between  
681 samples was detected, probably caused during subsampling of cultures. Since the laboratory  
682 component of this study, the increased use of metabarcoding in many areas of research (*e.g.*  
683 environmental DNA, or eDNA) applications, has resulted in specialized sample collection,  
684 processing workflows, laboratory environments, and establishing threshold detections designed  
685 to reduce contamination risks.

686         Although metabarcoding processing time and costs may limit uptake currently, with  
687 increased development it is highly likely to become a useful technique for analysing samples  
688 collected during active HABs, leading to an unprecedented monitoring opportunity of HABs in  
689 terms of sensitivity and precision.

690

## CONCLUSIONS

691 Applying light microscopy and various molecular techniques to culture and field samples  
692 containing multiple harmful algal species allowed cross validation of these techniques and  
693 offered a significant foundation for choosing appropriate techniques for targeted taxa in the  
694 future. DNA yields were considerably higher for the cultures and filtered field samples, whereas  
695 pelleted samples were often unusable. While TaqMan assays were available only for four out of  
696 14 HAB taxa of concern in BC, assays for detection of *A. tamarense*, *H. akashiwo*, and *P.*  
697 *verruculosa* provided adequate identification results. This indicates a need for the development  
698 of primers and probes for the rest of the harmful species to allow cost effective detection of  
699 many species simultaneously. Sequencing data obtained during this study enabled the  
700 development of new qPCR assays tailored for species within the northeastern Pacific Ocean.

701 Metabarcoding with a combination of markers (*i.e.* 16S, 18S-diatom, 18S-dinoflagellate,  
702 and LSU) allowed the identification of over 350 taxa and proved to be an unmatched technique  
703 for phytoplankton community structure analysis. Different markers had different strengths for  
704 particular taxa, although result congruence was observed among amplicons. The 18S-diatom  
705 amplicon identified harmful taxa from the diatom and raphidophyte groups, and the 18S-  
706 dinoflagellate and LSU amplicons, producing similar results to each other, overall provided the  
707 best identification for harmful algae from dinoflagellate and haptophytes groups, as well as the  
708 raphidophyte *H. akashiwo*. Although cyanobacteria were detected by only the 16S amplicon, this  
709 amplicon was weak for most of the HABs species. All amplicons appeared to underperform for  
710 identification of silicoflagellate algae, although the reason for this remains unknown. The  
711 isolated culture from the fish-killing event associated with a *P. verruculosa* bloom (morphology-  
712 based identification) was confirmed as *P. verruculosa* by qPCR and *Pseudochattonella* spp. by  
713 NGS. This is the first record of both PCR and metabarcoding confirmation of *Pseudochattonella*  
714 associated with a fish kill in Canada. Overall, the combination of morphology and molecular-  
715 based identification, if implemented, will greatly improve HABs monitoring, help mitigate issues  
716 caused by HABs, and aid in better understanding the dynamics of the phenomenon. This work  
717 demonstrates a pressing need to tailor qPCR assays, to improve reference databases, and apply a  
718 multiple marker approach for metabarcoding of diverse taxa.

719

720 **DATA AVAILABILITY**

721 Analysis pipeline: [https://github.com/bensutherland/eDNA\\_metabarcoding](https://github.com/bensutherland/eDNA_metabarcoding)

722 Raw data: raw sequence was uploaded to SRA under BioProject PRJNA544881 within  
723 BioSample accessions SAMN11865982-SAMN11866125.

724

725 **SUPPLEMENTAL INFORMATION**

726 **Supplemental File S1.** Number of reads for each taxonomic group identified with the 16S  
727 amplicon.

728 **Supplemental File S2.** Number of reads for each taxonomic group identified with the 18S  
729 diatom amplicon.

730 **Supplemental File S3.** Number of reads for each taxonomic group identified with the 18S  
731 dinoflagellate amplicon.

732 **Supplemental File S4.** Number of reads for each taxonomic group identified with the LSU  
733 amplicon.

734 **Supplemental File S5.** Average number of algae taxa (t) and algae species (s) detected by the  
735 different amplicons.

736 **Supplemental File S6.** Taxa detected by microscopy, the closest match as detected by NGS, the  
737 percentage of total reads for that sample represented by the match, and the percentage of  
738 unknown reads in the sample.

739

## ACKNOWLEDGEMENTS

740 This project was supported by the Aquaculture Collaborative Research and Development  
741 Program (ACRDP; Project number: P-12-01-003) of Fisheries and Oceans Canada and the  
742 British Columbia aquaculture industry including Creative Salmon Company Ltd., Grieg Seafood  
743 BC Ltd., Mainstream Canada (now Cermaq Canada), Marine Harvest Canada Inc. (now Mowi  
744 Canada West), Cleanwater Shellfish Ltd., Island Scallops Ltd., Little Wing Oysters Ltd., Mac's  
745 Oysters Ltd., Nelson Island Sea Farms Ltd., and Taylor Shellfish Canada ULC. Yves Perreault of  
746 Little Wing Oysters Ltd. and Dave Guhl of Marine Harvest Canada Inc. are acknowledged for  
747 helping with sediment sampling at Okeover Inlet and Quatsino Sound, respectively. Crew of the  
748 Deep Bay Marine Station enabled sediment sampling in Baynes Sound. Laurie Keddy (Pacific  
749 Biological Station, DFO) is thanked for maintaining established cultures and providing advice on  
750 isolation and culturing.

751

## AUTHOR CONTRIBUTIONS

753 Wrote the proposal to obtain funding: KM, CP, NH. Conceived and designed the experiments:  
754 NH, SE, KM, AT, CP. Performed the experiments: SE, NH, AT. Bioinformatics: BS. Analyzed  
755 the data: SE, AT, BS, NH. Contributed reagents/materials/analysis tools: KM, CP, NH. Wrote  
756 the manuscript: SE, BS, AT. Revised and approved the manuscript: SE, BS, AT, KM, CP, NH.

757

758

## REFERENCES

- 759 Altschul, S.F., Madden, T.L., Schäffer, A.A., Zhang, J., Zhang, Z., Miller, W., Lipman, D.J.,  
760 1997. Gapped BLAST and PSI-BLAST: A new generation of protein database search  
761 programs. *Nucleic Acids Res.* <https://doi.org/10.1093/nar/25.17.3389>
- 762 Andersen, N., 2012. Ichthyotoxic algae and their effects on fish. ... Univ. Det Natur-og ....
- 763 Andersen, P., Throndsen, J., 2004. Estimating cell numbers, in: *Manual on Harmful Marine*  
764 *Microalgae. Monographs on Oceanographic Methodology No. 11.*
- 765 Anderson, D.M., Fukuyo, Y., Matsuoka, K., 2003. Cyst methodologies. *Man. Harmful Mar.*  
766 *Microalgae.*
- 767 Andrews, S., Babraham Bioinformatics, 2010. FastQC: A quality control tool for high  
768 throughput sequence data. *Manual.* <https://doi.org/citeulike-article-id:11583827>
- 769 Antonella, P., Luca, G., 2013. The quantitative real-time PCR applications in the monitoring of  
770 marine harmful algal bloom (HAB) species. *Environ. Sci. Pollut. Res.*  
771 <https://doi.org/10.1007/s11356-012-1377-z>
- 772 Balech, E., 1985. The genus *Alexandrium* or *Gonyaulax* of the *Tamarensis* group, in:  
773 *Proceedings of the Third International Conference on Toxic Dinoflagellates*, St. Andrews,  
774 New Brunswick, Canada, June 8-12, 1985.
- 775 Bowers, H.A., Tengs, T., Glasgow, J., Burkholder, J.M., Rublee, P.A., Oldach, D.W., 2000.  
776 Development of real-time PCR assays for rapid detection of *Pfiesteria piscicida* and related  
777 dinoflagellates. *Appl. Environ. Microbiol.* [https://doi.org/10.1128/AEM.66.11.4641-](https://doi.org/10.1128/AEM.66.11.4641-4648.2000)  
778 [4648.2000](https://doi.org/10.1128/AEM.66.11.4641-4648.2000)
- 779 Bowers, H.A., Tomas, C., Tengs, T., Kempton, J.W., Lewitus, A.J., Oldach, D.W., 2006.  
780 *Raphidophyceae [chadefaud ex silva] systematics and rapid identification: Sequence*  
781 *analyses and real-time PCR assays.* *J. Phycol.* [https://doi.org/10.1111/j.1529-](https://doi.org/10.1111/j.1529-8817.2006.00285.x)  
782 [8817.2006.00285.x](https://doi.org/10.1111/j.1529-8817.2006.00285.x)
- 783 Boyer, F., Mercier, C., Bonin, A., Le Bras, Y., Taberlet, P., Coissac, E., 2016. obitools: a unix-  
784 inspired software package for DNA metabarcoding. *Mol. Ecol. Resour.*  
785 <https://doi.org/10.1111/1755-0998.12428>
- 786 Cembella, A.D., 2003. Chemical ecology of eukaryotic microalgae in marine ecosystems.  
787 *Phycologia* 42, 420–447. <https://doi.org/10.2216/i0031-8884-42-4-420.1>
- 788 Chamberlain, S.A., Szöcs, E., 2013. taxize: taxonomic search and retrieval in R. *F1000Research*.  
789 <https://doi.org/10.12688/f1000research.2-191.v2>
- 790 Coyne, K.J., Handy, S.M., Demir, E., Whereat, E.B., Hutchins, D.A., Portune, K.J., Doblin,  
791 M.A., Cary Craig, S., 2005. Improved quantitative real-time PCR assays for enumeration of  
792 harmful algal species in field samples using an exogenous DNA reference standard. *Limnol.*  
793 *Oceanogr. Methods.* <https://doi.org/10.4319/lom.2005.3.381>
- 794 Delaney, J.A., Ulrich, R.M., Paul, J.H., 2011. Detection of the toxic marine diatom *Pseudo-*  
795 *nitzschia multiseries* using the *RuBisCO* small subunit (*rbcS*) gene in two real-time RNA  
796 amplification formats. *Harmful Algae.* <https://doi.org/10.1016/j.hal.2011.07.005>
- 797 Department of Fisheries and Oceans Canada [WWW Document], n.d.

- 798 Eckford-Soper, L.K., Daugbjerg, N., 2015. Examination of six commonly used laboratory  
799 fixatives in HAB monitoring programs for their use in quantitative PCR based on Taqman  
800 probe technology. *Harmful Algae*. <https://doi.org/10.1016/j.hal.2014.12.007>
- 801 Edvardsen, B., Eikrem, W., Throndsen, J., Sáez, A.G., Probert, I., Medlin, L.K., 2011.  
802 Ribosomal DNA phylogenies and a morphological revision provide the basis for a revised  
803 taxonomy of the Prymnesiales (haptophyta). *Eur. J. Phycol.* 46, 202–228.  
804 <https://doi.org/10.1080/09670262.2011.594095>
- 805 Eikrem, W., Edvardsen, B., 1999. *Chrysochromulina fragaria* sp nov (Prymnesiophyceae), a new  
806 haptophyte flagellate from Norwegian waters. *Phycologia* 38, 149–155. <https://doi.org/DOI>  
807 [10.2216/i0031-8884-38-2-149.1](https://doi.org/10.2216/i0031-8884-38-2-149.1)
- 808 Eiler, A., Drakare, S., Bertilsson, S., Pernthaler, J., Peura, S., Rofner, C., Simek, K., Yang, Y.,  
809 Znachor, P., Lindström, E.S., 2013. Unveiling Distribution Patterns of Freshwater  
810 Phytoplankton by a Next Generation Sequencing Based Approach. *PLoS One*.  
811 <https://doi.org/10.1371/journal.pone.0053516>
- 812 Esenkulova, S., Haigh, N., 2012. First report of *Dinophysis* species causing diarrhetic shellfish  
813 poisoning in British Columbia, Canada. *Harmful Algae News UNESCO* 45, 16–17.
- 814 Esenkulova, S., Luinenburg, O., Neville, C.M., Trudel, M., 2015. Observations of *Heterosigma*  
815 *akashiwo* bloom and associated wild salmon lethargic behaviour in Cowichan Bay, Canada.  
816 *Harmful Algae News* 50, 16–18.
- 817 Ewels, P., Magnusson, M., Lundin, S., Käller, M., 2016. MultiQC: Summarize analysis results  
818 for multiple tools and samples in a single report. *Bioinformatics*.  
819 <https://doi.org/10.1093/bioinformatics/btw354>
- 820 G. Cronberg, E.J.C. and W.W.C., 2003. Taxonomy of harmful cyanobacteria, in: *Manual on*  
821 *Harmful Marine Microalgae*. <https://doi.org/10.1016/B978-0-12-391499-6.00008-6>
- 822 Goodwin, S., McPherson, J.D., McCombie, W.R., 2016. Coming of age: Ten years of next-  
823 generation sequencing technologies. *Nat. Rev. Genet.* <https://doi.org/10.1038/nrg.2016.49>
- 824 Gray, M., Wawrik, B., Paul, J., Casper, E., 2003. Molecular detection and quantitation of the red  
825 tide dinoflagellate *Karenia brevis* in the marine environment. *Appl. Environ. Microbiol.*  
826 <https://doi.org/10.1128/AEM.69.9.5726-5730.2003>
- 827 Guillard, 1978. . Counting slides. In: Sournia, A. (Ed.), *Phytoplankton Manual*. Monographs on  
828 Oceanographic Methodology 6, UNESCO user manual. <https://doi.org/10.2216/i0031-8884->  
829 [19-4-341.1](https://doi.org/10.2216/i0031-8884-19-4-341.1)
- 830 Haigh, N., Brown, T., Johnson, D., 2019. Ichthyotoxic skeleton-forming silicoflagellates in  
831 British Columbia, Canada; results from the Harmful Algae Monitoring Program, 1999 –  
832 2017, in: Hess, P. (Ed.), . *Proceedings of the 18th International Conference on Harmful*  
833 *Algae*.
- 834 Haigh, N., Esenkulova, S., 2014. Economic losses to the British Columbia salmon aquaculture  
835 industry due to harmful algal blooms, 2009-2012. *PICES Sci. Rep.* 2.
- 836 Haigh, N., Esenkulova, S., Pudota, J., Pearce, C.M., Keddy, L.J., Tabata, A., Miller, K.M., 2014.  
837 First confirmed report of fish-killing *Pseudochattonella* species (Dictyochophyceae) on the  
838 west coast of Canada, in: MacKenzie, L. (Ed.), *Proceedings of the 16th International*  
839 *Conference on Harmful Algae*. Cawthron Institute, Nelson, pp. 270–273.



- 840 Hallegraeff, G.M., 2004. Harmful algal blooms: a global overview, Manual on Harmful Marine  
841 Microalgae. <https://doi.org/10.1016/B978-0-12-391499-6.00008-6>
- 842 Handy, S.M., Demir, E., Hutchins, D.A., Portune, K.J., Whereat, E.B., Hare, C.E., Rose, J.M.,  
843 Warner, M., Farestad, M., Cary, S.C., Coyne, K.J., 2008. Using quantitative real-time PCR  
844 to study competition and community dynamics among Delaware Inland Bays harmful algae  
845 in field and laboratory studies. *Harmful Algae*. <https://doi.org/10.1016/j.hal.2007.12.018>
- 846 Handy, S.M., Hutchins, D.A., Cary, S.C., Coyne, K.J., 2006. Simultaneous enumeration of  
847 multiple raphidophyte species by quantitative real-time PCR: Capabilities and limitations.  
848 *Limnol. Oceanogr. Methods*. <https://doi.org/10.4319/lom.2006.4.193>
- 849 Harrison, P.J., Waters, R.E., Taylor, F.J.R., 1980. A BROAD SPECTRUM ARTIFICIAL SEA  
850 WATER MEDIUM FOR COASTAL AND OPEN OCEAN PHYTOPLANKTON. *J.*  
851 *Phycol.* <https://doi.org/10.1111/j.0022-3646.1980.00028.x>
- 852 Hasle, G.R., 1978. Identification problems. General recommendations. *Phytoplankt. manual.*  
853 *UNESCO Monogr. Ocean. Method* 6, 125–128.
- 854 Hasle, G.R., Syvertsen, E.E., 1996. Marine diatoms, in: *Identifying Marine Diatoms and*  
855 *Dinoflagellates*. p. 598. <https://doi.org/DOI:10.1016/B978-012693015-3/50005-X>
- 856 Henriksen, P., Knipschildt, F., Moestrup, Ø., Thomsen, H. a., 1993. Autecology, life history and  
857 toxicology of the silicoflagellate *Dictyocha speculum* (Silicoflagellata, Dictyochophyceae).  
858 *Phycologia* 32, 29–39. <https://doi.org/10.2216/i0031-8884-32-1-29.1>
- 859 Horner, R.A., Garrison, D.L., Plumley, F.G., 1997. Harmful algal blooms and red tide problems  
860 on the U.S. west coast. *Limnol. Oceanogr.* [https://doi.org/10.4319/lo.1997.42.5\\_part\\_2.1076](https://doi.org/10.4319/lo.1997.42.5_part_2.1076)
- 861 Hosoi-Tanabe, S., Sako, Y., 2005. Species-specific detection and quantification of toxic marine  
862 dinoflagellates *Alexandrium tamarense* and *A. catenella* by real-time PCR assay. *Mar.*  
863 *Biotechnol.* <https://doi.org/10.1007/s10126-004-4128-4>
- 864 Huson, D.H., Beier, S., Flade, I., Górská, A., El-Hadidi, M., Mitra, S., Ruscheweyh, H.J., Tappu,  
865 R., 2016. MEGAN Community Edition - Interactive Exploration and Analysis of Large-  
866 Scale Microbiome Sequencing Data. *PLoS Comput. Biol.*  
867 <https://doi.org/10.1371/journal.pcbi.1004957>
- 868 Jakobsen, R., Hansen, P.J., Daugbjerg, N., Andersen, N.G., 2012. The fish-killing  
869 dictyochophyte *Pseudochattonella farcimen*: Adaptations leading to bloom formation during  
870 early spring in Scandinavian waters. *Harmful Algae* 18, 84–95.  
871 <https://doi.org/10.1016/j.hal.2012.04.008>
- 872 John, U., Litaker, R.W., Montresor, M., Murray, S., Brosnahan, M.L., Anderson, D.M., 2014.  
873 Formal revision of the *Alexandrium tamarense* species complex (dinophyceae) taxonomy:  
874 The introduction of five species with emphasis on molecular-based (rDNA) classification.  
875 *Protist.* <https://doi.org/10.1016/j.protis.2014.10.001>
- 876 Kamikawa, R., Asai, J., Miyahara, T., Murata, K., Oyama, K., Yoshimatsu, S., Yoshida, T.,  
877 Sako, Y., 2006. Application of a Real-time PCR Assay to a Comprehensive Method of  
878 Monitoring Harmful Algae. *Microbes Environ.* <https://doi.org/10.1264/jsme2.21.163>
- 879 Kudela, R.M., Gobler, C.J., 2012. Harmful dinoflagellate blooms caused by *Cochlodinium* sp.:  
880 Global expansion and ecological strategies facilitating bloom formation. *Harmful Algae* 14,  
881 71–86. <https://doi.org/10.1016/j.hal.2011.10.015>



- 882 Lilly, E.L., Halanych, K.M., Anderson, D.M., 2007. Species boundaries and global biogeography  
883 of the *Alexandrium tamarensis* complex (Dinophyceae). *J. Phycol.*  
884 <https://doi.org/10.1111/j.1529-8817.2007.00420.x>
- 885 Livak, K.J., Schmittgen, T.D., 2001. Analysis of relative gene expression data using real-time  
886 quantitative PCR and the 2- $\Delta\Delta$ CT method. *Methods.*  
887 <https://doi.org/10.1006/meth.2001.1262>
- 888 Manning, S.R., La Claire, J.W., 2010. Prymnesins: Toxic metabolites of the golden alga,  
889 *Prymnesium parvum* Carter (Haptophyta). *Mar. Drugs.* <https://doi.org/10.3390/md8030678>
- 890 Martin, M., 2011. Cutadapt removes adapter sequences from high-throughput sequencing reads.  
891 *EMBnet.journal.* <https://doi.org/10.14806/ej.17.1.200>
- 892 Medlin, L.K., Orozco, J., 2017. Molecular techniques for the detection of organisms in aquatic  
893 environments, with emphasis on harmful algal bloom species. *Sensors (Switzerland).*  
894 <https://doi.org/10.3390/s17051184>
- 895 Miller, K.M., Gardner, I.A., Vanderstichel, R., Brunley, T., Schulze, A.D., Li, K.H., Kaukinen,  
896 K.H., Ming, T.J., Ginther, N.G., 2016. Report on the performance evaluation of the  
897 Fluidigm BioMark platform for high-throughput microbe monitoring in salmon. *DFO Can.*  
898 *Sci. Advis. Sec. Res. Doc.*
- 899 Moestrup, Ø., 2003. Taxonomy of toxic haptophytes (prymnesiophytes), in: *Manual on Harmful*  
900 *Marine Microalgae.* pp. 433–463.
- 901 Moestrup, Ø., Codd, G.A., Elbrächter, M., Faust, M.A., Fraga, S., Fukuyo, Y., Cronberg, G.,  
902 Halim, Y. (Eds), 2008. IOC-UNESCO Taxonomic Reference List of Harmful Micro Algae.  
903 Available online at <http://www.marinespecies.org/HAB>.
- 904 Nabout, J.C., da Silva Rocha, B., Carneiro, F.M., Sant'Anna, C.L., 2013. How many species of  
905 Cyanobacteria are there? Using a discovery curve to predict the species number. *Biodivers.*  
906 *Conserv.* 22, 2907–2918. <https://doi.org/10.1007/s10531-013-0561-x>
- 907 Ondov, B.D., Bergman, N.H., Phillippy, A.M., 2011. Interactive metagenomic visualization in a  
908 Web browser. *BMC Bioinformatics.* <https://doi.org/10.1186/1471-2105-12-385>
- 909 Park, T.-G., Park, Y.-T., Lee, Y., 2009. Development of a SYTO9 based real-time PCR probe  
910 for detection and quantification of toxic dinoflagellate *Karlodinium veneficum*  
911 (Dinophyceae) in environmental samples. *Phycologia.* <https://doi.org/10.2216/08-52.1>
- 912 Park, T.G., Park, G.H., Park, Y.T., Kang, Y.S., Bae, H.M., Kim, C.H., Jeong, H.J., Lee, Y.,  
913 2009. Identification of the dinoflagellate community during *Cochlodinium polykrikoides*  
914 (Dinophyceae) blooms using amplified rDNA melting curve analysis and real-time PCR  
915 probes. *Harmful Algae.* <https://doi.org/10.1016/j.hal.2008.09.003>
- 916 Place, A.R., Bowers, H.A., Bachvaroff, T.R., Adolf, J.E., Deeds, J.R., Sheng, J., 2012.  
917 *Karlodinium veneficum*-The little dinoflagellate with a big bite. *Harmful Algae* 14, 179–  
918 195. <https://doi.org/10.1016/j.hal.2011.10.021>
- 919 R Core Team. [WWW Document], 2018. . R A Lang. *Environ. Stat. Comput. R Found. Stat.*  
920 *Comput. Vienna.* URL <https://www.r-project.org>
- 921 Rensel, J.E., Whyte, J.N.C., 2004. Finfish mariculture and harmful algal blooms. *Man. harmful*  
922 *Mar. microalgae. Monogr. Oceanogr. Methodol.* 11, 693–722.

- 923 Rinta-Kanto, J.M., Ouellette, A.J.A., Boyer, G.L., Twiss, M.R., Bridgeman, T.B., Wilhelm,  
924 S.W., 2005. Quantification of toxic *Microcystis* spp. during the 2003 and 2004 blooms in  
925 western Lake Erie using quantitative real-time PCR. *Environ. Sci. Technol.*  
926 <https://doi.org/10.1021/es048249u>
- 927 Satake, M., MacKenzie, L., Yasumoto, T., 1998. Identification of *Protoceratium reticulatum* as  
928 the biogenetic origin of yessotoxin. *Nat. Toxins* 5, 164–167.  
929 <https://doi.org/10.1002/19970504NT7>
- 930 Scholin, C., Doucette, G., Jensen, S., Roman, B., Pargett, D., Marin III, R., Preston, C., Jones,  
931 W., Feldman, J., Everlove, C., Harris, A., Alvarado, N., Massion, E., Birch, J., Greenfield,  
932 D., Wheeler, K., Vrijenhoek, R., Mikulski, C., Jones, K., 2011. Remote Detection of Marine  
933 Microbes, Small Invertebrates, Harmful Algae, and Biotoxins using the Environmental  
934 Sample Processor (ESP). *Oceanography*. <https://doi.org/10.5670/oceanog.2009.46>
- 935 Scott, A., Szoecs, E., Foster, Z., Ram, K., Baumgartner, J., Donnell, J.O., 2019. Package ‘taxize  
936 .’
- 937 Skjelbred, B., Horsberg, T.E., Tollefsen, K.E., Andersen, T., Edvardsen, B., 2011. Toxicity of  
938 the ichthyotoxic marine flagellate *Pseudochattonella* (Dictyochophyceae, Heterokonta)  
939 assessed by six bioassays. *Harmful Algae* 10, 144–154.  
940 <https://doi.org/10.1016/j.hal.2010.08.007>
- 941 Tange, O., 2011. GNU Parallel: The Command-Line Power Tool. *USENIX*;login;
- 942 Taylor, F.J.R., Harrison, P.J., 2002. Harmful algal blooms in western Canadian coastal waters.  
943 Harmful algal Bloom. *PICES Reg. North Pacific. PICES Sci. Rep.* 1965, 77–88.  
944 <https://doi.org/10.4103/1735-5362.213981>
- 945 Taylor, F.J.R., Hoppenrath, M., Saldarriaga, J.F., 2008. Dinoflagellate diversity and distribution.  
946 *Biodivers. Conserv.* <https://doi.org/10.1007/s10531-007-9258-3>
- 947 Toebe, K., Alpermann, T.J., Tillmann, U., Krock, B., Cembella, A., John, U., 2013. Molecular  
948 discrimination of toxic and non-toxic *Alexandrium* species (Dinophyta) in natural  
949 phytoplankton assemblages from the Scottish coast of the North Sea. *Eur. J. Phycol.*  
950 <https://doi.org/10.1080/09670262.2012.752870>
- 951 Toebe, K., Joshi, A.R., Messtorff, P., Tillmann, U., Cembella, A., John, U., 2012. Molecular  
952 discrimination of taxa within the dinoflagellate genus *Azadinium*, the source of azaspiracid  
953 toxins. *J. Plankton Res.* <https://doi.org/10.1093/plankt/fbs077>
- 954 Toyoda, K., Nagasaki, K., Tomaru, Y., 2010. Application of real-time PCR assay for detection  
955 and quantification of bloom-forming diatom *Chaetoceros tenuissimus* Meunier. *Plankt.*  
956 *Benthos Res.* <https://doi.org/10.3800/pbr.5.56>
- 957 Valentini, A., Taberlet, P., Miaud, C., Civade, R., Herder, J., Thomsen, P.F., Bellemain, E.,  
958 Besnard, A., Coissac, E., Boyer, F., Gaboriaud, C., Jean, P., Poulet, N., Roset, N., Copp,  
959 G.H., Geniez, P., Pont, D., Argillier, C., Baudoin, J.-M., Peroux, T., Crivelli, A.J., Olivier,  
960 A., Acqueberge, M., Le Brun, M., Møller, P.R., Willerslev, E., Dejean, T., 2016. Next-  
961 generation monitoring of aquatic biodiversity using environmental DNA metabarcoding.  
962 *Mol. Ecol.* <https://doi.org/10.1111/mec.13428>
- 963 Vancouver, G., 1798. Seaman poisoned by mussels, in: Robinson (Ed.), *A Voyage of Discovery*  
964 *to the North Pacific Ocean and Round the World.* Paternoster-Row and J. Edwards, London.

- 965 Venrick, E.L., 1978. Systematic sampling in a planktonic ecosystem. *Fish. Bull.* 76, 617–627.
- 966 Wall, D., Dale, B., 1967. The resting cysts of modern marine dinoflagellates and their  
967 palaeontological significance. *Rev. Palaeobot. Palynol.* [https://doi.org/10.1016/0034-](https://doi.org/10.1016/0034-6667(67)90165-0)  
968 [6667\(67\)90165-0](https://doi.org/10.1016/0034-6667(67)90165-0)
- 969 Whyte, J.N.C. (Ian), Haigh, N., Ginther, N.G., Keddy, L.J., 2001. First record of blooms of  
970 *Cochlodinium* sp. (Gymnodiniales, Dinophyceae) causing mortality to aquacultured salmon  
971 on the west coast of Canada. *Phycologia* 40, 298–304. [https://doi.org/10.2216/i0031-8884-](https://doi.org/10.2216/i0031-8884-40-3-298.1)  
972 [40-3-298.1](https://doi.org/10.2216/i0031-8884-40-3-298.1)
- 973 Whyte, J.N.C., Davis, J.C., Forbes, J.R., 1997. Harmful algae in Canadian waters and  
974 management strategies. *Oceanogr. Lit. Rev.* 7, 1234–1235.
- 975 Wickham, H., 2016. *ggplot2: elegant graphics for data analysis*. Springer.
- 976 Yuan, J., Mi, T., Zhen, Y., Yu, Z., 2012. Development of a rapid detection and quantification  
977 method of *Karenia mikimotoi* by real-time quantitative PCR. *Harmful Algae*.  
978 <https://doi.org/10.1016/j.hal.2012.03.004>
- 979 Zamor, R.M., Glenn, K.L., Hambright, K.D., 2012. Incorporating molecular tools into routine  
980 HAB monitoring programs: Using qPCR to track invasive *Prymnesium*. *Harmful Algae*.  
981 <https://doi.org/10.1016/j.hal.2011.10.028>
- 982

983

## FIGURES AND TABLES

984

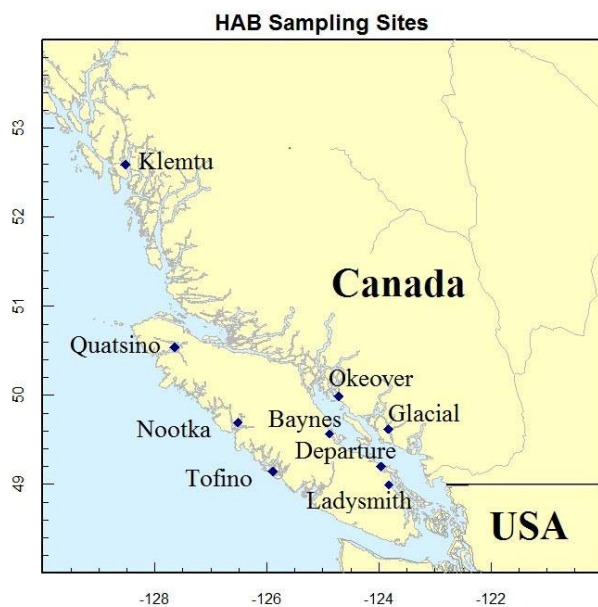

986 **Figure 1.** Map of Vancouver Island and British Columbia coast with locations of the sampling  
987 stations.

988

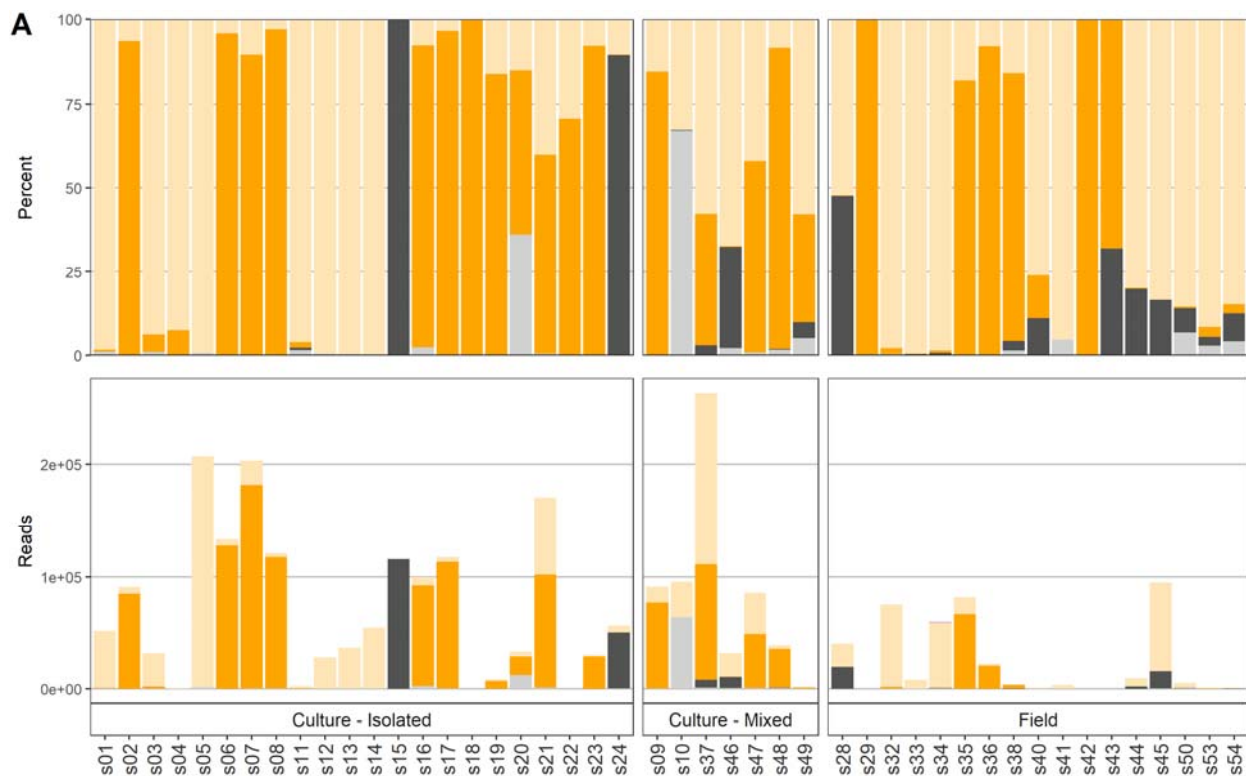

989

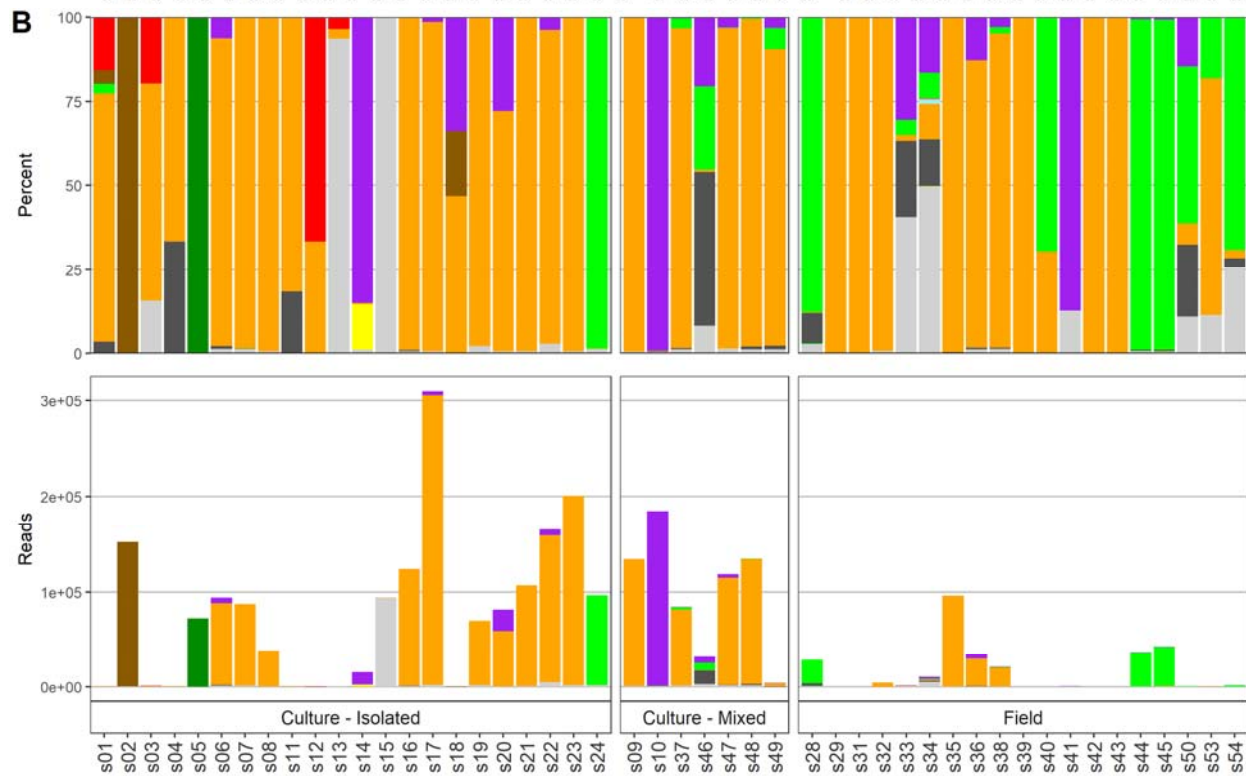

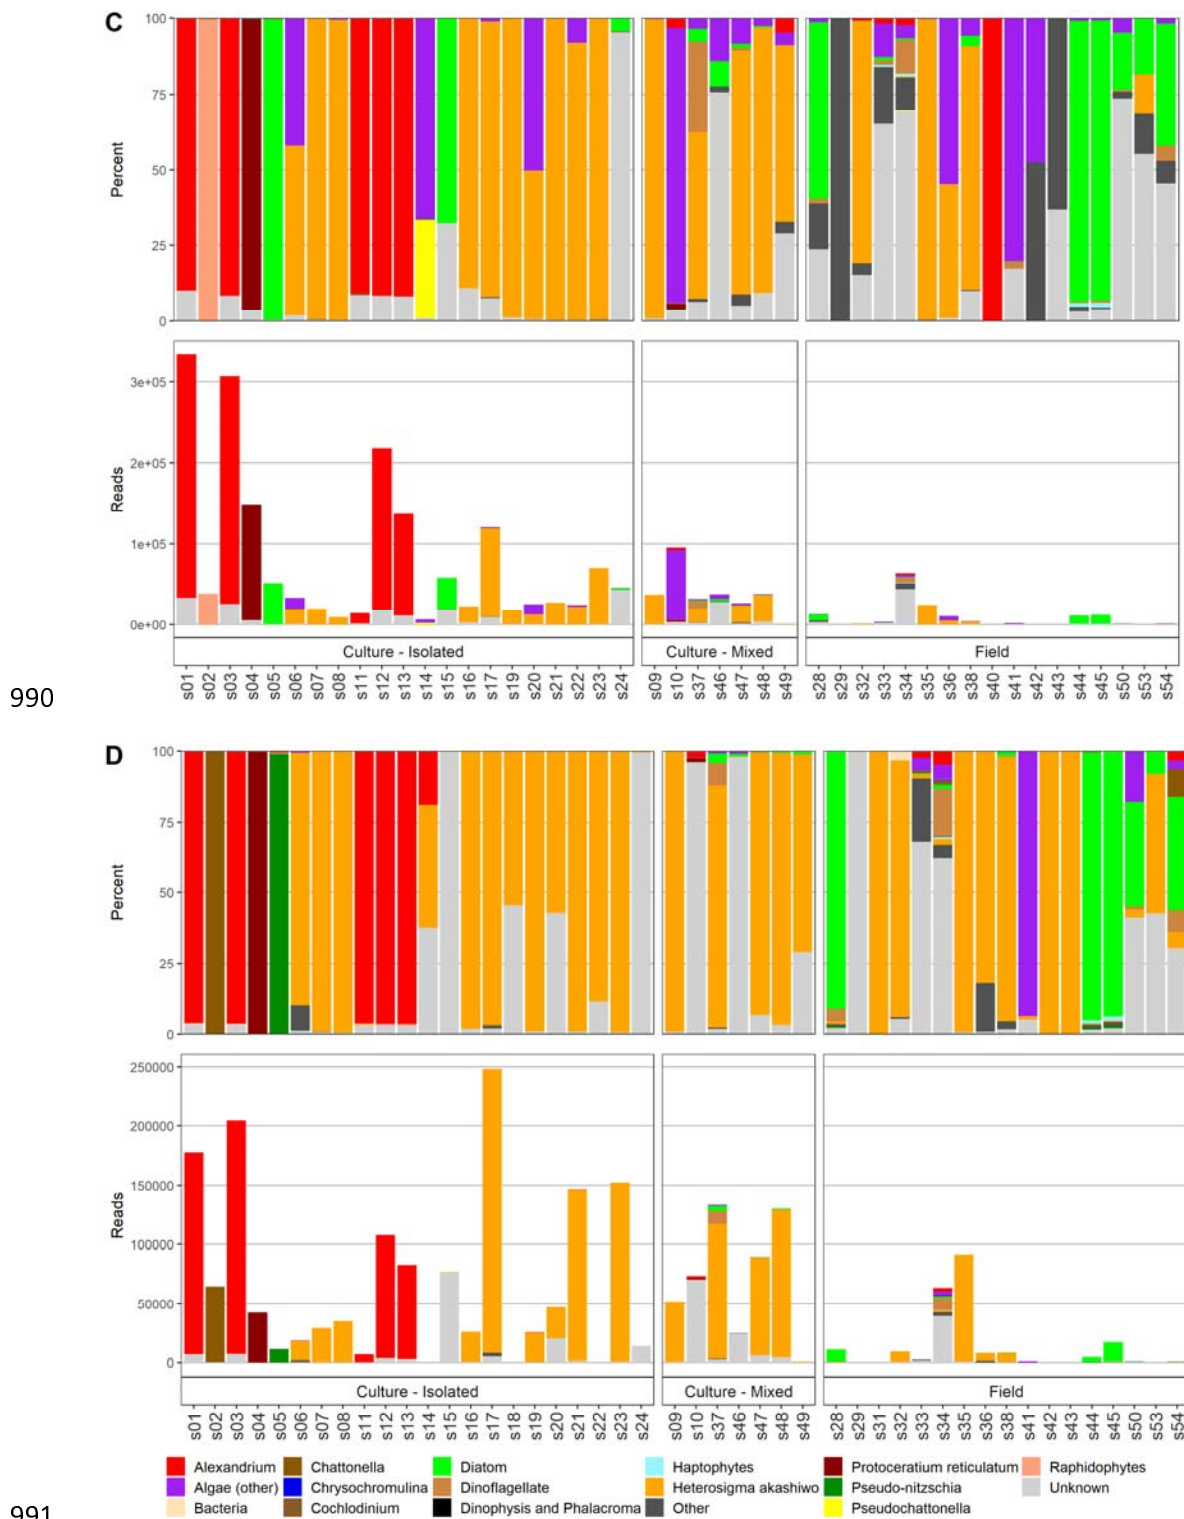

992 **Figure 2.** Percentages and number of reads per sample with emphasis on harmful and potentially  
 993 harmful algal species: (A) 16S, (B) 18S-Diatom, (C) 18S-Dinoflagellate, and (D) LSU.  
 994



995 **Table 1.** Sample identifiers, the microscopic observations, and their sampling origin and  
 996 collection location. Cultures from USA are denoted by an asterisk, with s01 from North Pacific  
 997 Ocean, Sequim Bay, Washington and s02 from North Atlantic Ocean, Indian River Bay,  
 998 Delaware.

| <b>ID</b> | <b>Microscopy observations</b>                                                                              | <b>Sample origin</b> | <b>Sampling location</b> |
|-----------|-------------------------------------------------------------------------------------------------------------|----------------------|--------------------------|
| s01       | <i>Alexandrium</i> cf <i>catenella</i>                                                                      | PC                   | Sequim Bay*              |
| s02       | <i>Chattonella subsalsa</i>                                                                                 | PC                   | Indian River*            |
| s03       | <i>Alexandrium</i> sp.                                                                                      | IC                   | Okeover Inlet            |
| s04       | <i>Protoceratium reticulatum</i>                                                                            | IC                   | Okeover Inlet            |
| s05       | <i>Pseudo-nitzschia</i> spp.                                                                                | IC                   | Quatsino Sound           |
| s06       | <i>Heterosigma akashiwo</i>                                                                                 | IC                   | Quatsino Sound           |
| s07       | <i>Heterosigma akashiwo</i>                                                                                 | IC                   | Quatsino Sound           |
| s08       | <i>Heterosigma akashiwo</i>                                                                                 | IC                   | Quatsino Sound           |
| s09       | <i>Heterosigma akashiwo</i> , Raphidophyte ( <i>Chattonella</i> sp.?), nanoflagellates                      | MC                   | Quatsino Sound           |
| s10       | <i>Alexandrium</i> sp., flagellates, green algae                                                            | MC                   | Okeover Inlet            |
| s11       | <i>Alexandrium</i> sp.                                                                                      | IC                   | Okeover Inlet            |
| s12       | <i>Alexandrium tamarensis</i>                                                                               | IC                   | Okeover Inlet            |
| s13       | <i>Alexandrium</i> sp.                                                                                      | IC                   | Okeover Inlet            |
| s14       | <i>Pseudochattonella</i> cf. <i>verruculosa</i>                                                             | IC                   | Quatsino Sound           |
| s15       | <i>Chaetoceros eibonii</i>                                                                                  | IC                   | Departure Bay            |
| s16       | <i>Heterosigma akashiwo</i>                                                                                 | IC                   | Quatsino Sound           |
| s17       | <i>Heterosigma akashiwo</i> , <i>Chattonella</i> sp.?                                                       | IC                   | Quatsino Sound           |
| s18       | <i>Heterosigma akashiwo</i>                                                                                 | IC                   | Quatsino Sound           |
| s19       | <i>Heterosigma akashiwo</i>                                                                                 | IC                   | Quatsino Sound           |
| s20       | <i>Heterosigma akashiwo</i>                                                                                 | IC                   | Ladysmith                |
| s21       | <i>Heterosigma akashiwo</i>                                                                                 | IC                   | Departure Bay            |
| s22       | <i>Heterosigma akashiwo</i>                                                                                 | IC                   | Klemtu                   |
| s23       | <i>Heterosigma akashiwo</i>                                                                                 | IC                   | Glacial                  |
| s24       | <i>Pseudopedinella</i> sp.                                                                                  | IC                   | Klemtu                   |
| s25       | <i>Pseudopedinella</i> sp.                                                                                  | –                    | Quatsino Sound           |
| s26       | <i>Pseudopedinella</i> sp.                                                                                  | PWS                  | Quatsino Sound           |
| s27       | <i>Pseudopedinella</i> sp.                                                                                  | PWS                  | Quatsino Sound           |
| s28       | <i>Pseudopedinella</i> sp.                                                                                  | PWS                  | Quatsino Sound           |
| s29       | <i>Chattonella</i> sp., <i>Dictyocha</i> spp., <i>Heterosigma akashiwo</i> , <i>Prorocentrum gracile</i>    | PWS                  | Nootka Sound             |
| s30       | <i>Chattonella</i> sp., <i>Dictyocha</i> spp., <i>Heterosigma akashiwo</i> , <i>Prorocentrum gracile</i>    | FWS                  | Nootka Sound             |
| s31       | <i>Chattonella</i> sp., <i>Dictyocha</i> spp., <i>Heterosigma akashiwo</i> , <i>Prorocentrum gracile</i>    | FWS                  | Nootka Sound             |
| s32       | <i>Pseudopedinella</i> sp.?                                                                                 | FWS                  | Quatsino Sound           |
| s33       | <i>Chattonella</i> sp., <i>Pseudochattonella</i> sp., <i>Dictyocha</i> spp., <i>Cochlodinium fulvescens</i> | FWS                  | Quatsino Sound           |
| s34       | <i>Chattonella</i> sp., <i>Pseudochattonella</i> sp., <i>Dictyocha</i> spp., <i>Cochlodinium fulvescens</i> | FWS                  | Quatsino Sound           |
| s35       | <i>Heterosigma akashiwo</i>                                                                                 | FWS                  | Quatsino Sound           |



|     |                                                                                                            |     |                |
|-----|------------------------------------------------------------------------------------------------------------|-----|----------------|
| s36 | <i>Heterosigma akashiwo</i>                                                                                | FWS | Quatsino Sound |
| s37 | <i>Heterosigma akashiwo</i> , nanoflagellates, big Raphidophyte                                            | MC  | Baynes Sound   |
| s38 | <i>Heterosigma akashiwo</i> (various morphotypes), nanoflagellates                                         | FWS | Quatsino Sound |
| s39 | <i>Chaetoceros</i> spp., <i>Skeletonema costatum</i> , <i>Dictyocha</i> spp., <i>Chrysochromulina</i> sp.? | FWS | Quatsino Sound |
| s40 | Diatoms, <i>Dictyocha</i> spp., <i>Chrysochromulina</i> sp.?                                               | FWS | Quatsino Sound |
| s41 | Green algae, Cyanobacteria                                                                                 | FWS | Quatsino Sound |
| s42 | <i>Heterosigma akashiwo</i>                                                                                | FWS | Tofino Inlet   |
| s43 | <i>Heterosigma akashiwo</i>                                                                                | FWS | Tofino Inlet   |
| s44 | <i>Chrysochromulina</i> sp.?                                                                               | FWS | Kunechin Point |
| s45 | <i>Chrysochromulina</i> sp.?                                                                               | FWS | Quatsino Sound |
| s46 | <i>Heterosigma akashiwo</i> , nanoflagellates, <i>Chattonella</i> sp.?, diatoms                            | MC  | Quatsino Sound |
| s47 | <i>Heterosigma akashiwo</i> , nanoflagellates, <i>Chattonella</i> sp.?, diatoms                            | MC  | Quatsino Sound |
| s48 | <i>Heterosigma akashiwo</i> , nanoflagellates, <i>Chattonella</i> sp.?, diatoms                            | MC  | Quatsino Sound |
| s49 | <i>Heterosigma akashiwo</i> , nanoflagellates, <i>Chattonella</i> sp.?, diatoms                            | MC  | Quatsino Sound |
| s50 | <i>Pseudochattonella</i> cf. <i>verruculosa</i>                                                            | PWS | Quatsino Sound |
| s51 | <i>Pseudochattonella</i> cf. <i>verruculosa</i>                                                            | PWS | Quatsino Sound |
| s52 | <i>Pseudochattonella</i> cf. <i>verruculosa</i>                                                            | PWS | Quatsino Sound |
| s53 | <i>Pseudochattonella</i> cf. <i>verruculosa</i>                                                            | PWS | Quatsino Sound |
| s54 | <i>Pseudochattonella</i> cf. <i>verruculosa</i>                                                            | PWS | Quatsino Sound |

999

1000 ? = suspected species; PC = purchased culture; IC = isolated culture; MC = mixed culture; FWS  
 1001 = filtered water sample; PWS – pelleted water sample.

1002 **Table 2.** Overview of the algal taxa and qPCR primers included in this study.

| Family            | Genus                    | Species              | Assay  | Size (bp)                   | Citation for the primer     | Forward Name         | Forward Sequence                   | Reverse Name            | Reverse Sequence                  | Probe Name              | Probe Sequence             |
|-------------------|--------------------------|----------------------|--------|-----------------------------|-----------------------------|----------------------|------------------------------------|-------------------------|-----------------------------------|-------------------------|----------------------------|
| Bacillariophyceae | <i>Chaetoceros</i>       | <i>tenuissimus</i>   | C.ten  | 64                          | Toyoda et al., 2010         | 2-10_EF              | TTG TGG AGA GGT ACG CTT GTC TT     | 2-10_ER                 | CCC TCA TAG GCA CCC TGT TC        | 2-10_Probe              | CCT TAG CTT AAA TCT CT     |
|                   | <i>Pseudonitzschia</i>   | <i>multiseries</i>   | P.mul  | 106                         | Delaney et al., 2011        | Pmulti_F             | AGATTTAACTGATG AACAAA              | Pmulti_R                | GTAAC TATTACGT GGGTGT             | Pmulti_P                | CTATTAGCCGCGGTTTA          |
| Cyanobacteria     | <i>Cyanobacteria</i>     | General              | Cyan   |                             | Rinta-Kanto et al., 2005    | CYAN-108-F           | ACGGGTGAGTAAC RCGTRA               | CYAN-377-R              | CCATGGCGGAAAA TTCCCC              | CYAN-328-P              | CTCAGTCCCAGTGTGGC TGNTC    |
|                   | <i>Microcystis</i>       | spp.                 | Micr   |                             | Rinta-Kanto et al., 2005    | Micr-184-F           | GCCGC RAGGTGAA AMCTAA              | Micr-431-R              | AATCCAAARACCT TCCTCCC             | Micr-228-P              | AAGAGCTTGCGTCTGAT TAGCTAGT |
| Dictyochophyceae  | <i>Pseudochattonella</i> | <i>verruculosa</i>   | P.ver1 | 227                         | Bowers et al., 2006         | ChattaqF or          | CCGTAGTAATTCTA GAGCTAATACRTG CA    | ChattaqRev              | AATTCTCCGTTACC CGTTAAAGCCAT       | CVerrProbe              | AATGGCGCGCAAGCGTG TATTATG  |
|                   |                          |                      | P.ver2 | 239                         | Handy et al., 2006          | Cv1561F              | ATGCATACAGCGA GTCTAGA              | Cv1780R                 | TCACTCCGAAAAG TGTC AAC            | CvProbe                 | CAAGAGTACCCAGGCCT CTCGACC  |
| Dinoflagellata    | <i>Alexandrium</i>       | <i>catenella</i>     | A.cat  | 160                         | Hosoi-Tanabe and Sako, 2005 | catF                 | CCTCAGTGAGATTG TAGTGC              | catR                    | GTGCAAAGGTAAT CAAATGTCC           | Taq man cat             | ATGGGTTTTGGCTGCAA GTGCA    |
|                   |                          | <i>minutum</i>       | A.min  | 89                          | Toebe et al., 2013          | Amin-F               | ACATGGATAACTG TGGTAATTCTATAG CT    | Amin-R                  | GTTGGTTCTGTAA CTAATGACCACA        | Amin-P                  | CATCCAAACCTGACTTC          |
|                   |                          | <i>tamarensis</i>    | A.tam1 | 131                         | Toebe et al., 2013          | At-NA-1-F            | CCACAGCCCAAAG CTCTTG               | At-NA-1-R               | CCATGAGGGAAAT ATGAAAAGG           | At-NA-1-P               | AACACTCCCACCAAGCA          |
|                   |                          |                      | A.tam2 | 108                         | Toebe et al., 2013          | At-ME-2-F            | GCATGCCAAGAAA GAATCATTGT           | At-ME-2-R               | TGTATTTGCTGAA CAAAAAGTAAACAGA     | At-ME-2-P               | AGCACAACAACCTCACC A        |
|                   |                          |                      | A.tam3 | 82                          | Toebe et al., 2013          | At-WE-3-F            | TTGTGTGTGTCAGG GCTTGTA             | At-WE-3-R               | GAATGTGTCTGGT GTATCTGTT           | At-WE-3-P               | CAACCTCAAACACATGG A        |
|                   |                          | A.tam4               | 230    | Hosoi-Tanabe and Sako, 2005 | tamF                        | TGCTGGTGGGAGT GTTGCA | tamR                               | TAAGTCCAAGGAA GGAAGCATC | Taqman tam                        | AGAGCTTTGGGCTGTGG GTGTA |                            |
|                   |                          | <i>tamutum</i>       | A.tamu | 90                          | Toebe et al., 2013          | Amut-F               | GAACATTTGCGAGC AACATTGTG           | Amut-R                  | GTGGTACTTGTGT GTGTTCCCTTG         | Amut-P                  | CTCAAGGAAGCAAACC           |
|                   | <i>Azadinium</i>         | <i>Obesum</i>        | A.obe  | 74                          | Toebe et al., 2012          | Aob134 F             | AGG GAT CGA TAC ACA AAT GAG TAC TG | Aob208R                 | AAA CTC CAG GGA CAT GGT AGT CTT A | Aob163                  | AAG ACA TTC GAC CTA CCG T  |
|                   |                          | <i>poporum</i>       | A.pop  | 68                          | Toebe et al., 2012          | Apop62 F             | GAT GCT CAA GGT GCC TAG AAA GTC    | Apop148 R               | CCT GCG TGT CTG GTT GCA           | Apop112                 | TTC CAG ACG ACT CAA A      |
|                   |                          | <i>spinosum</i>      | A.spi  | 72                          | Toebe et al., 2012          | Asp48F               | TCG TCT TTG TGT CAG GGA GAT G      | Asp120R                 | GGA AAC TCC TGA AGG GCT TGT       | Aspin77 T               | CGC CCA AAA GGA CTC CT     |
|                   | <i>Cochlodinium</i>      | <i>polykrikoides</i> | C.pol  | 148                         | Park et al., 2009           | CPITSF               | CGGCAACCTTTGTC AAACA               | CPITSR2                 | GGTTTGCTGATCT AACTTCATGTCT        | CPITSF                  | CAACCGTGATACCCGCT AGCTTTGC |
|                   |                          |                      | Cpoly  |                             | Kamikawa et al., 2006       | Cpoly-F              | CCACACGGTGAGA TTGTTGG              | Cpoly-R                 | GCCACCGAAGTCG TTCG                | Cpoly-P                 | CCACCAATCACCAATGA CC       |
| <i>Gyrodinium</i> | <i>impudicum</i>         | G.imp                | 105    | Park et al.,                | GIITSF                      | GAGTGCTTGTGCCT       | GIITSR                             | CGTTAGCCAGTT            | GIITSP                            | CCTCAGGAGCGCCTCGA       |                            |

|                                   |                         |                             |        |      |                             |              |                               |              |                                       |                |                                                |
|-----------------------------------|-------------------------|-----------------------------|--------|------|-----------------------------|--------------|-------------------------------|--------------|---------------------------------------|----------------|------------------------------------------------|
|                                   | <i>m</i>                |                             |        |      | 2009                        |              | CAGGAT                        |              | GGTTGAC                               |                | GAACA                                          |
|                                   |                         | <i>instriatum</i>           | G.ins  | 108  | Handy et al., 2008          | Gi 166F      | GCACAAATCCCA<br>ACTTCGCGG     | Gi 274R      | GCTCGAATGATTC<br>ATCGCCAGCA           | GiProbe        | CCAACACAGGCTCTGCC<br>TGTTCTC                   |
|                                   | <i>Heterocapsa</i>      | <i>circularisquama</i>      | H.cir  |      | Kamikawa et al., 2006       | HcircF       | GTTTGCCTATGGT<br>GAGC         | HcircR       | CATTGTGTCAGGG<br>AGGAG                | Taq-Circ       | CACCACAAGGTCATGAG<br>GACACA                    |
|                                   | <i>Karenia</i>          | <i>Brevis</i>               | K.bre  | 91   | Gray et al., 2003           |              | TGAAACGTTATTGG<br>GTCTGT      |              | AGGTACACACTTT<br>CGTAAACTA            |                | TTAACCTTAGTCTCGGGT<br>A                        |
|                                   |                         | <i>mikimotoi</i>            | K.mik1 |      | Kamikawa et al., 2006       | KmikiF       | GTCTGGTAGCACTG<br>CTTCA       | KmikiR       | GTCGGTTGCTGGT<br>GCAAAA               | Taq-miki       | TGCTCCTGGCACCAACA<br>AC                        |
|                                   |                         |                             | K.mik2 |      | Yuan et al., 2012           | KMF          | CTTTGTGTGTAACC<br>TGTTGCTTTGT | KMR          | TCAGCGGGTTTGC<br>TTACCT               | KMP            | ACCTGTCTCTGTCTGC<br>CACTTCATTGT                |
|                                   | <i>Karlodinium</i>      | <i>micrum/veneficum</i>     | K.ven1 | ~150 | Handy et al., 2008          | Dino 1662F   | CCGATTGAGTGWT<br>CCGGTGAATAA  | Euk B        | GATCCWTCTGCAG<br>GTTACCTAC            | KvProbe        | CCGCTGCAACGTTCCAGG<br>AACTAAACACTG             |
|                                   |                         | <i>veneficum</i>            | K.ven2 | 120  | Park et al., 2009           | KVITSF 3     | CTGTGAACTTCTTT<br>GTGAGCTCTT  | KVITSR 3     | TAGCGATAGCTTC<br>GCAGACA              | KVITSP 3       | AGGTGAATCCCAATGCT<br>GCTCCACTA                 |
|                                   | <i>Pfiesteria</i>       | <i>piscicida</i>            | P. pi  | 213  | Bowers et al., 2000         | 107          | CAGTTAGATTGTCT<br>TTGGTGGTCAA | 320          | TGATAGGTCAGAA<br>AGTGATATGGTA         | Probe          | CATGCACCAAAGCCCGA<br>CTTCTCG                   |
|                                   | <i>Prorocentrum</i>     | <i>minimum</i>              | P.min  | 325  | Handy et al., 2008          | Pm 200F      | TGTGTTTATTAGTT<br>ACAGAACCAGC | Pm 525R      | AATTCTACTCATTC<br>CAATTACAAGACA<br>AT | PmProbe        | CCGCTGGTCTTTGGTG<br>ATTCATAATAAC               |
|                                   | <i>Pseudopfiesteria</i> | <i>shumwayae</i>            | P.shu  | 78   | Bowers et al., 2000         | PSITSF1      | TTGACGCATTGAG<br>GCTATGG      | PSITSR       | AAACGGATGCAAA<br>CGAGTTG              | PSITSP1        | CGGCTTCTTGCGACG<br>AATCAC                      |
| Haptophyceae/<br>Prymnesiophyceae | <i>Prymnesium</i>       | <i>Parvum</i>               | P.par1 | 195  | Manning and La Claire, 2010 | FucoF        | CTGCAGATGGTCTT<br>CCTCATC     | FucoR        | AACCCTGGAGAGA<br>CGAAGTTC             | 0              | AAGCCTGACCTTGACGC<br>TGATGAG                   |
|                                   |                         |                             | P.par2 | 132  | Zamor et al., 2012          | PrymF        | TGTCTGCCGTGGAC<br>TTAGTGCT    | PrymR-3      | ATGGCACAACGAC<br>TTGGT                | PrymP          | ACGTGTGCCGACGTGCT<br>AGTAG                     |
| Raphidophyceae                    | <i>Chattonella</i>      | <i>marina/ovata/antiqua</i> | C.mar1 |      | Kamikawa et al., 2006       | ChattF       | GCTCTTTGTTCTCT<br>GCATCC      | ChattR       | CAGTCCAATCACT<br>GCAACC               | Taq-Chatt      | GCAACGGCAAGATGGAA<br>CC                        |
|                                   |                         |                             | C.mar2 | 224  | Bowers et al., 2006         | Cmarina For  | GGTAGTTGCCGTAC<br>ATTTTGCTCTT | Cmarina Rev  | AAAAGTGGATTCA<br>GCCGAAGCTTC          | Cmarina Probe  | TTGAGTTCAACGGGCGT<br>GGTAGC                    |
|                                   |                         | <i>subsalsa</i>             | C.sub1 | 156  | Bowers et al., 2006         | Subsalsa For | TTGGATTCCGACGG<br>GC          | Subsalsa Rev | ATATGCTTAAATT<br>CAGCGGGTTTTT         | Subsalsa Probe | TTCGGCCAAGCACACAT<br>TTCGGCCAAGCACACAT<br>CCTC |
|                                   |                         |                             | C.sub2 | ~350 | Coyne et al., 2005          | Cs 1350F     | CTAAATAGTGTGG<br>GTAATGCTTAC  | Cs 1705R     | GGCAAGTCACAAT<br>AAAGTTCCAA           | Raph Probe     | CAACGAGTACTTTCCTTG<br>GCCGGAA                  |
|                                   | <i>Fibrocapsa</i>       | <i>japonica</i>             | F.jap  | 167  | Bowers et al., 2006         | Fjap490 For  | TGAAAACGGCCCG<br>TACACA       | Fjap657R ev  | CGGGAACAGCTCA<br>TGATGT               | Fjap578P robe  | CGGCTGGACACGCTTCT<br>G                         |
|                                   | <i>Heterosigma</i>      | <i>akashiwo</i>             | H.aka1 | 228  | Bowers et al., 2006         | Haka127 For  | AAAGGTGCGTGCT<br>CAGTCGTGGT   | Haka355 Rev  | CAAAAGTCTTTTC<br>ATCTTCCCT            | Haka222 Probe  | TACGAGCCGTTTCCGAC<br>GA                        |
|                                   |                         |                             | H.aka2 | ~350 | Coyne et al., 2005          | Hs 1350F     | CTAAATAGTGTGCG<br>GTAATGCTTCT | Hs 1705R     | GGCAAGTCACAAT<br>AAAGTTCCAT           | Hs Probe       | CAACGAGTAACGACCTT<br>TGCCGGAA                  |
|                                   |                         |                             | H.aka3 |      | Kamikawa et al., 2006       | HakaF        | CTGCTGAAGGAAG<br>CGATTG       | HakaR        | GGAACGCGCAGTC<br>AAAG                 | Taq-aka        | GGAGCGTTTCAACATGC<br>GTTT                      |

1003 **Table 3.** TaqMan assay amplification results (Ct values).

| Sample # | Microscopy observations                                                                                              | A.tam1 | Cyan | G.ins_ | H.aka1 | H.aka3 | K.ven1 | K.ven2 | P.ver1 |
|----------|----------------------------------------------------------------------------------------------------------------------|--------|------|--------|--------|--------|--------|--------|--------|
| s01      | <i>Alexandrium cf catenella</i>                                                                                      | 8.0    |      |        | 24.2   |        |        |        |        |
| s02      | <i>Chattonella subsalsa</i>                                                                                          |        |      |        |        |        |        |        |        |
| s03      | <i>Alexandrium</i> sp.                                                                                               | 9.8    |      |        | 23.2   |        |        |        |        |
| s04      | <i>Protoceratium reticulatum</i>                                                                                     | 21.7   | 26.5 |        | 25.3   |        |        |        |        |
| s05      | <i>Pseudo-nitzschia</i> spp.                                                                                         | 25.1   |      |        | 26.1   |        |        |        |        |
| s06      | <i>Heterosigma akashiwo</i>                                                                                          |        |      |        | 25.2   |        |        |        |        |
| s07      | <i>Heterosigma akashiwo</i>                                                                                          |        |      |        | 28.6   |        |        |        |        |
| s08      | <i>Heterosigma akashiwo</i>                                                                                          | 36.2   |      |        | 18.6   |        |        |        |        |
| s09      | <i>Heterosigma akashiwo</i> ,<br>big Raphidophyte<br>( <i>Chattonella</i> sp.),<br>nanoflagellates                   |        |      |        | 11.7   |        |        |        |        |
| s10      | <i>Alexandrium</i> sp.,<br>flagellates, green algae                                                                  | 22.7   | 18.4 |        | 28.7   |        |        |        |        |
| s11      | <i>Alexandrium</i> sp.                                                                                               | 17.2   |      |        | 25.4   |        |        |        |        |
| s12      | <i>Alexandrium tamarense</i>                                                                                         | 8.7    |      |        |        |        |        |        |        |
| s13      | <i>Alexandrium</i> sp.                                                                                               | 8.4    | 24.4 |        |        |        |        |        |        |
| s14      | <i>Pseudochattonella cf verruculosa</i>                                                                              | 25.7   |      |        | 26.6   |        |        |        | 14.0   |
| s15      | <i>Chaetoceros eibonii</i>                                                                                           | 23.9   |      |        | 23.6   | 27.1   |        |        |        |
| s16      | <i>Heterosigma akashiwo</i>                                                                                          |        |      |        | 26.1   |        |        |        |        |
| s17      | <i>Heterosigma akashiwo</i> ,<br><i>Chattonella</i> sp.?                                                             |        |      |        |        |        |        |        |        |
| s18      | <i>Heterosigma akashiwo</i>                                                                                          |        |      |        | 26.4   |        |        |        |        |
| s19      | <i>Heterosigma akashiwo</i>                                                                                          |        |      |        | 25.8   |        |        |        |        |
| s20      | <i>Heterosigma akashiwo</i>                                                                                          |        |      |        | 26.2   |        |        |        |        |
| s21      | <i>Heterosigma akashiwo</i>                                                                                          |        |      |        | 28.9   |        |        |        |        |
| s22      | <i>Heterosigma akashiwo</i>                                                                                          |        |      |        | 17.1   |        |        |        |        |
| s23      | <i>Heterosigma akashiwo</i>                                                                                          |        |      |        | 10.3   |        |        |        |        |
| s24      | <i>Pseudopedinella</i> sp.                                                                                           | 27.1   |      |        |        |        |        |        |        |
| s28      | <i>Pseudopedinella</i> sp.                                                                                           |        |      |        |        |        | 16.3   |        |        |
| s31      | <i>Chattonella</i> sp.,<br><i>Dictyocha</i> spp.,<br><i>Heterosigma akashiwo</i> ,<br><i>Prorocentrum gracile</i>    |        | 29.1 | 30.9   | 24.2   |        | 14.2   | 29.1   |        |
| s32      | <i>Pseudopedinella</i> sp.?                                                                                          | 35.2   |      |        | 17.6   |        | 22.9   |        |        |
| s33      | <i>Chattonella</i> sp.,<br><i>Pseudochattonella</i> sp.,<br><i>Dictyocha</i> spp.,<br><i>Cochlodinium fulvescens</i> | 25.7   | 18.8 |        | 23.9   |        | 21.1   |        |        |

|     |                                                                                                                      |      |      |      |      |      |
|-----|----------------------------------------------------------------------------------------------------------------------|------|------|------|------|------|
| s34 | <i>Chattonella</i> sp.,<br><i>Pseudochattonella</i> sp.,<br><i>Dictyocha</i> spp.,<br><i>Cochlodinium fulvescens</i> | 21.2 | 16.9 | 20.5 | 13.4 | 29.2 |
| s35 | <i>Heterosigma akashiwo</i>                                                                                          |      |      | 23.6 |      |      |
| s36 | <i>Heterosigma akashiwo</i>                                                                                          |      |      | 19.8 |      |      |
| s37 | <i>Heterosigma akashiwo</i> ,<br>nanoflagellates, big<br>Raphidophyte                                                |      |      | 13.7 | 25.6 |      |
| s38 | <i>Heterosigma akashiwo</i><br>(various morphotypes),<br>nanoflagellates                                             |      |      | 12.7 |      |      |
| s39 | <i>Chaetoceros</i> spp.,<br><i>Skeletonema costatum</i> ,<br><i>Dictyocha</i> spp.,<br><i>Chrysochromulina</i> sp.?  |      |      |      |      |      |
| s40 | Diatoms, <i>Dictyocha</i> spp.,<br><i>Chrysochromulina</i> sp.?                                                      | 24.2 | 34.7 | 27.4 | 20.2 |      |
| s41 | Green algae,<br>Cyanobacteria                                                                                        |      |      |      | 19.7 |      |
| s42 | <i>Heterosigma akashiwo</i>                                                                                          | 24.6 | 25.6 |      |      |      |
| s43 | <i>Heterosigma akashiwo</i>                                                                                          | 28.6 | 21.6 |      |      |      |
| s44 | <i>Chrysochromulina</i> sp.?                                                                                         | 24.4 | 31.7 | 27.2 |      |      |
| s45 | <i>Chrysochromulina</i> sp.?                                                                                         | 34.1 |      | 29.5 | 22.2 |      |
| s46 | <i>Heterosigma akashiwo</i> ,<br>nanoflagellates,<br><i>Chattonella</i> sp.?, diatoms                                |      |      | 22.1 |      |      |
| s47 | <i>Heterosigma akashiwo</i> ,<br>nanoflagellates,<br><i>Chattonella</i> sp.?, diatoms                                |      |      | 24.4 |      |      |
| s48 | <i>Heterosigma akashiwo</i> ,<br>nanoflagellates,<br><i>Chattonella</i> sp.?, diatoms                                |      |      | 25.6 |      |      |
| s49 | <i>Heterosigma akashiwo</i> ,<br>nanoflagellates,<br><i>Chattonella</i> sp.?, diatoms                                |      |      | 27.0 |      |      |
| s50 | <i>Pseudochattonella</i> cf<br><i>verruculosa</i>                                                                    | 36.0 |      |      | 22.5 |      |
| s53 | <i>Pseudochattonella</i> cf<br><i>verruculosa</i>                                                                    |      | 23.1 | 25.7 |      |      |

1004 Note: Full name for the primer abbreviation and its citation are listed in Table 2. Note that Ct's  
1005 on the microfluidics BioMark platform are approximately 10 Ct values lower than on traditional  
1006 single-assay platforms (Miller et al., 2016).

1007 **Table 4.** Taxon levels and number of reads detected by the four different amplicons: 16S, 18S-  
 1008 Diatom, 18S-Dinoflagellate, and large subunit (LSU).  
 1009

| Taxon level                  | 16S       |                | 18S Diatom |                | 18S Dino   |                | LSU        |                |
|------------------------------|-----------|----------------|------------|----------------|------------|----------------|------------|----------------|
|                              | Count     | Reads          | Count      | Reads          | Count      | Reads          | Count      | Reads          |
| Species                      | 21        | 1281094        | 18         | 1947366        | 49         | 667599         | 60         | 1819902        |
| Genus                        | 27        | 229337         | 32         | 570709         | 52         | 1005795        | 46         | 103234         |
| Family                       | 11        | 41069          | 10         | 1095           | 23         | 104880         | 10         | 14705          |
| Order                        | 2         | 100            | 6          | 17002          | 18         | 96580          | 6          | 3295           |
| Higher taxonomic rank        | 5         | 976679         | 8          | 29705          | 20         | 2222           | 9          | 6296           |
| N/A, unknown                 | 3         | 87534          | 4          | 122585         | 5          | 270013         | 5          | 291360         |
| <b>Total individual taxa</b> | <b>69</b> | <b>2615813</b> | <b>78</b>  | <b>2688462</b> | <b>167</b> | <b>2147089</b> | <b>136</b> | <b>2238792</b> |

1010

1011 **Table 5.** Number of reads per taxonomic category and percent of total microalgae reads.

| Row Labels                                           | 16S       | 18S       | 18S             | LSU       |
|------------------------------------------------------|-----------|-----------|-----------------|-----------|
|                                                      |           | Diatom    | Dinoflagellates |           |
| Diatoms                                              | 30        | 291561    | 128820          | 49063     |
| Dinoflagellate                                       |           | 557       | 1087060         | 630785    |
| Raphidophytes                                        | 1229547   | 1993049   | 509885          | 1249934   |
| Silicoflagellates                                    |           | 12272     | 5992            |           |
| Cryptophytes                                         |           |           | 366             | 594       |
| Haptophytes                                          |           | 134       | 962             | 982       |
| Microalgae (other)                                   | 95        | 238460    | 116431          | 4944      |
| Cyanobacteria                                        | 101       | 14        | 21              |           |
| Bacteria                                             | 1076778   |           |                 | 450       |
| Fungi                                                |           | 30        | 606             | 3620      |
| N/A, unknown                                         | 87534     | 122585    | 270013          | 291360    |
| Other                                                | 221728    | 29800     | 26933           | 7060      |
| <b>Percent of total reads in microalgae taxa (%)</b> | <b>47</b> | <b>94</b> | <b>87</b>       | <b>86</b> |

1012



1013 **Table 6.** Number of reads for all detected harmful and potentially harmful algae species, genera,  
1014 and families.

| Taxonomic group                                           | 16S      | 18S<br>Diatom | 18S<br>Dino   | LSU           | Amplicon returning<br>maximum read |
|-----------------------------------------------------------|----------|---------------|---------------|---------------|------------------------------------|
| <i>Alexandrium andersonii</i>                             |          |               | 97            |               | 18S Diatom                         |
| <i>Alexandrium fundyense</i>                              |          |               |               | 549437        | LSU                                |
| <i>Alexandrium</i> spp.                                   |          | 509           | 920011        | 14871         | 18S Dino                           |
| <i>Alexandrium tamarensis</i>                             |          |               | 4300          | 292           | 18S Dino                           |
| <b>Total <i>Alexandrium</i> spp.</b>                      | <b>0</b> | <b>509</b>    | <b>924408</b> | <b>564600</b> | <b>18S Dino</b>                    |
| <i>Chattonella</i> spp.                                   |          | 152203        | 40            | 64380         | 18S Diatom                         |
| <i>Chattonella subsalsa</i>                               |          |               | 58            | 28            | 18S Dino                           |
| <b>Total <i>Chattonella</i> spp.</b>                      | <b>0</b> | <b>152203</b> | <b>98</b>     | <b>64408</b>  | <b>18S Diatom</b>                  |
| <i>Dinophysis parvula</i>                                 |          |               |               | 13            | LSU                                |
| <i>Dinophysis</i> spp.                                    |          |               | 119           | 111           | 18S Dino                           |
| <i>Phalacroma rapa</i>                                    |          |               |               | 44            | LSU                                |
| <b>Total <i>Dinophysis</i> and <i>Phalacroma</i> spp.</b> | <b>0</b> | <b>0</b>      | <b>119</b>    | <b>168</b>    | <b>LSU</b>                         |
| <i>Karlodinium</i> spp.                                   |          |               | 21            | 50            | LSU                                |
| <i>Karlodinium veneticum</i>                              |          |               |               | 27            | LSU                                |
| <b>Total <i>Karlodinium</i> spp.</b>                      | <b>0</b> | <b>0</b>      | <b>21</b>     | <b>77</b>     | <b>LSU</b>                         |
| <i>Prymnesium kappa</i>                                   |          |               |               | 20            | LSU                                |
| <i>Prymnesium</i> spp.                                    |          |               | 10            |               | 18S Dino                           |
| <b>Total <i>Prymnesium</i> spp.</b>                       | <b>0</b> | <b>0</b>      | <b>10</b>     | <b>20</b>     | <b>LSU</b>                         |
| <i>Pseudo-nitzschia</i> sp. B HAB-2017                    |          |               |               | 33            | LSU                                |
| <i>Pseudo-nitzschia</i> spp.                              |          | 72978         |               | 11254         | 18S Diatom                         |
| <b>Total <i>Pseudo-nitzschia</i> spp.</b>                 | <b>0</b> | <b>72978</b>  | <b>0</b>      | <b>11287</b>  | <b>18S Diatom</b>                  |
| <i>Pseudochattonella farcimen</i>                         |          | 167           |               |               | 18S Diatom                         |
| <i>Pseudochattonella</i> spp.                             |          | 1944          | 2104          |               | 18S Dino                           |
| <b>Total <i>Pseudochattonella</i> spp.</b>                | <b>0</b> | <b>2111</b>   | <b>2104</b>   | <b>0</b>      | <b>18S Dino</b>                    |
| <i>Chattonellaceae</i>                                    |          |               | 38486         |               | 18S Dino                           |
| <i>Chrysochromulina</i> spp.                              |          |               |               | 220           | LSU                                |
| <i>Cochlodinium</i> spp.                                  |          |               |               | 1016          | LSU                                |
| <i>Heterosigma akashiwo</i>                               | 1229451  | 1840799       | 471269        | 1185484       | 18S Diatom                         |
| <i>Protoceratium reticulatum</i>                          |          |               | 145010        | 43109         | 18S Dino                           |
| <i>Prymnesiaceae</i>                                      |          |               | 11            |               | 18S Dino                           |

1015

1016 **Table 7.** Evaluation of harmful taxa detection methods based on the present study: \*\* = best  
 1017 current technique(s) for taxa detection (at least one designated per taxon), \* = technique that can  
 1018 detect taxa, 0 = no taxa detection, n/a = not applied.

| <b>Harmful taxa</b>                          | <b>qPCR</b> | <b>16S</b> | <b>18S-<br/>Diatom</b> | <b>18S-<br/>Dinoflagellate</b> | <b>LSU</b> |
|----------------------------------------------|-------------|------------|------------------------|--------------------------------|------------|
| <i>Alexandrium tamarense</i> complex         | *           | 0          | *                      | **                             | **         |
| <i>Chattonella</i> spp.                      | 0           | 0          | **                     | *                              | *          |
| <i>Chrysochromulina</i> spp.                 | n/a         | 0          | 0                      | **                             | *          |
| <i>Cochlodinium</i> spp.                     | n/a         | 0          | 0                      | 0                              | **         |
| Cyanobacteria                                | *           | **         | 0                      | 0                              | 0          |
| <i>Dictyocha</i> spp.                        | n/a         | 0          | 0                      | 0                              | 0          |
| <i>Dinophysis</i> and <i>Phalacroma</i> spp. | n/a         | 0          | 0                      | **                             | **         |
| <i>Heterosigma akashiwo</i>                  | *           | *          | **                     | *                              | **         |
| <i>Karlodinium</i> spp.                      | *           | 0          | 0                      | *                              | **         |
| <i>Protoceratium reticulatum</i>             | n/a         | 0          | 0                      | **                             | *          |
| <i>Prymnesium</i> spp.                       | n/a         | 0          | 0                      | *                              | **         |
| <i>Pseudochattonella</i> spp.                | *           | 0          | **                     | *                              | 0          |
| <i>Pseudo-nitzschia</i> spp.                 | n/a         | 0          | **                     | 0                              | *          |
| <i>Pseudopedinella</i> spp.                  | n/a         | 0          | 0                      | 0                              | 0          |

1019
